# Supplementary material for: Molecular investigation of the dual inhibition mechanism for targeted P53 regulator MDM2/MDMX inhibitors
Source: Royal Society of Chemistry journal article supplement (doi:10.1039/d2cp01780f), 2022-01-01
Supplement: d2cp01780f1.pdf [file d2cp01780f1.pdf]

## **Molecular Investigation of the Dual Inhibition Mechanism for**

### **Targeted P53 Regulator MDM2 / MDMX Inhibitors**

*Xiaoyu Zhao, Danyang Xiong, Song Luo, Lili Duan\**

School of Physics and Electronics, Shandong Normal University, Jinan, 250014, China

Corresponding author ([duanll@sdu.edu.cn](mailto:duanll@sdu.edu.cn))

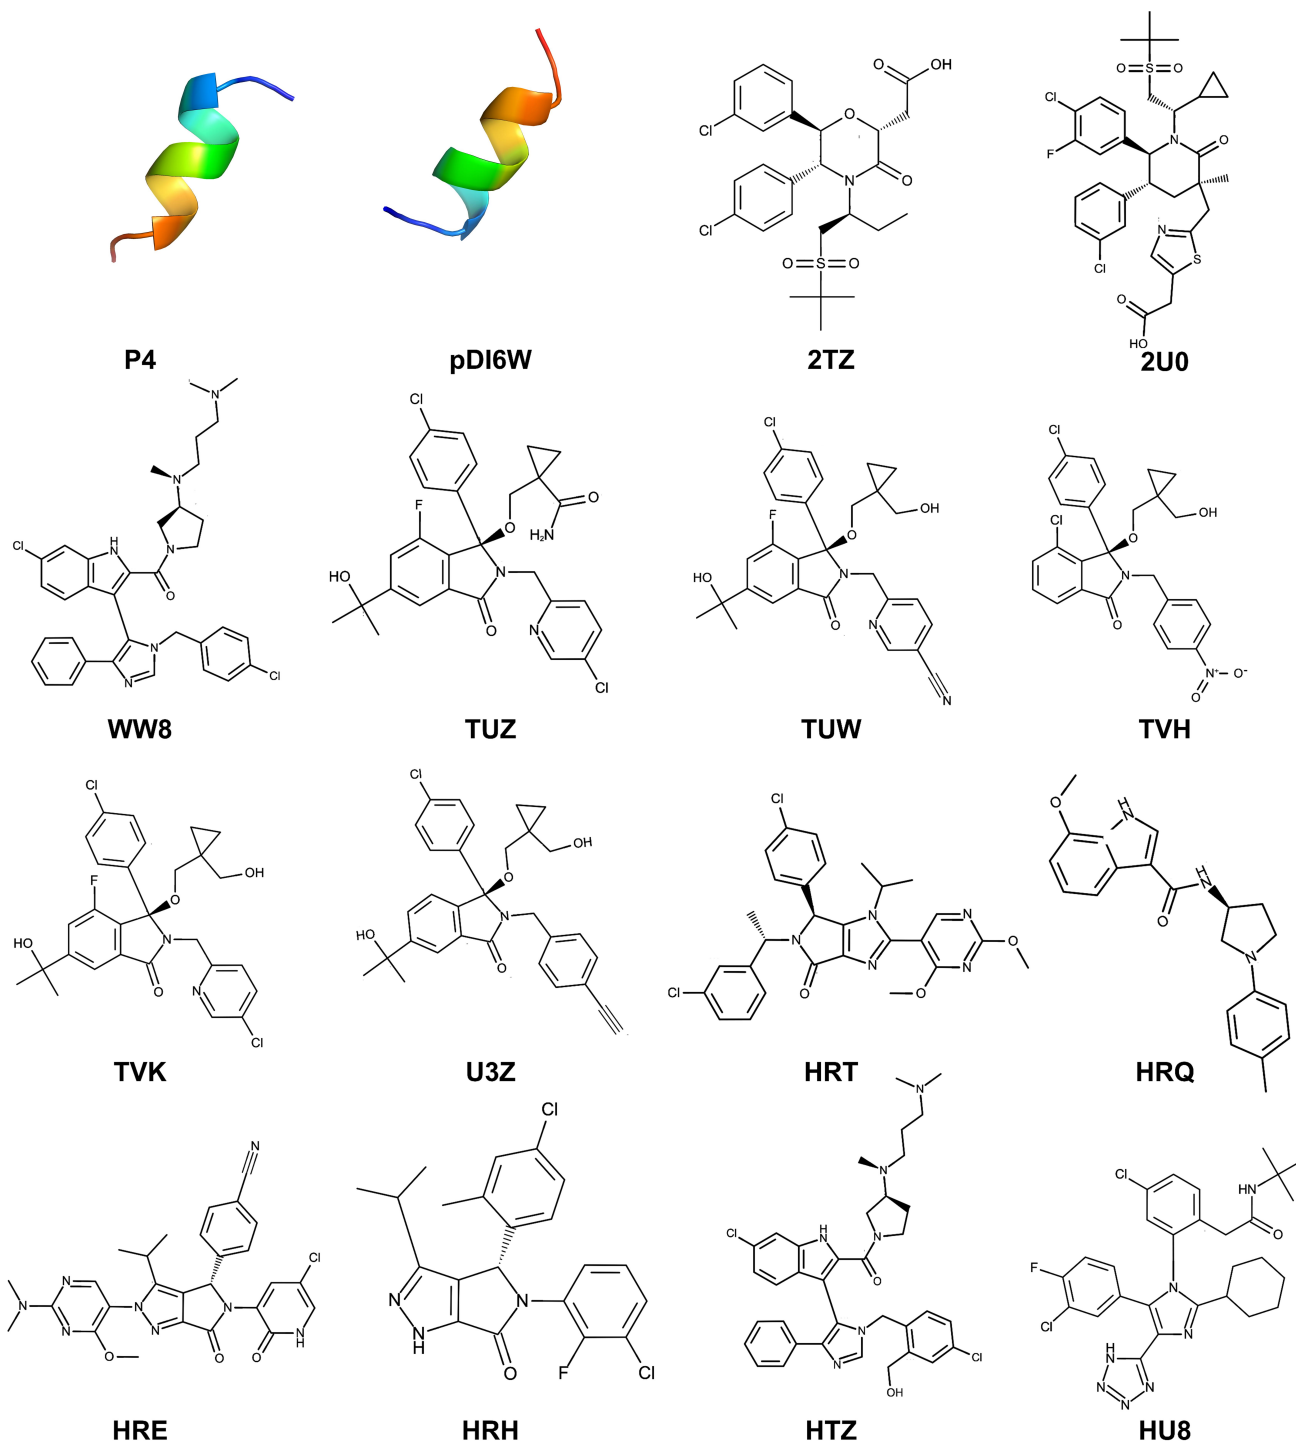

**Figure S1.** The structure of 16 potential inhibitors, including two short peptides and 14 non-peptides inhibitors.

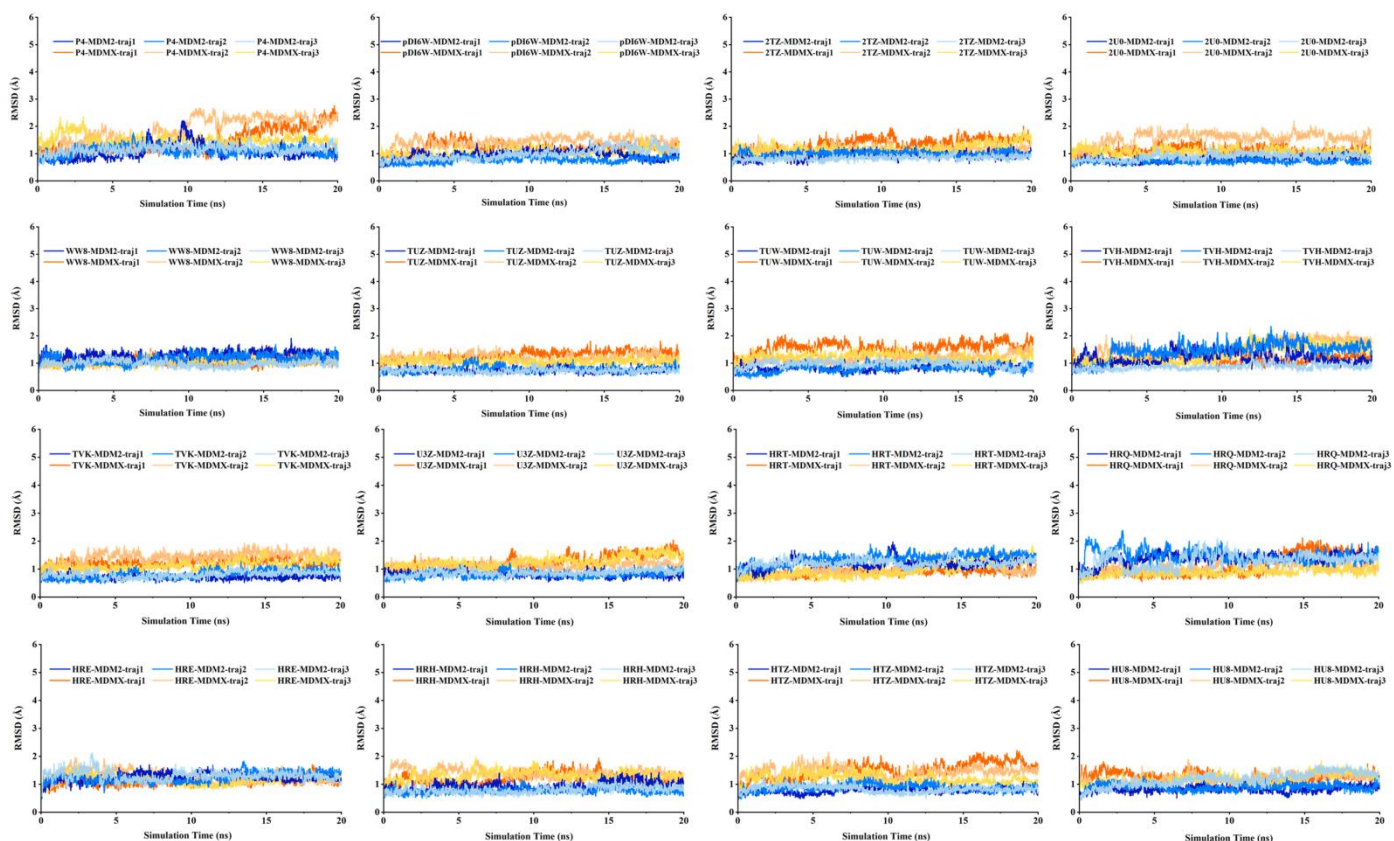

**Figure S2.** The root mean square deviation (RMSD) of the protein backbone atoms relative to the corresponding initial conformation for the 16-pair systems, and three MD trajectories are shown for each system, respectively.

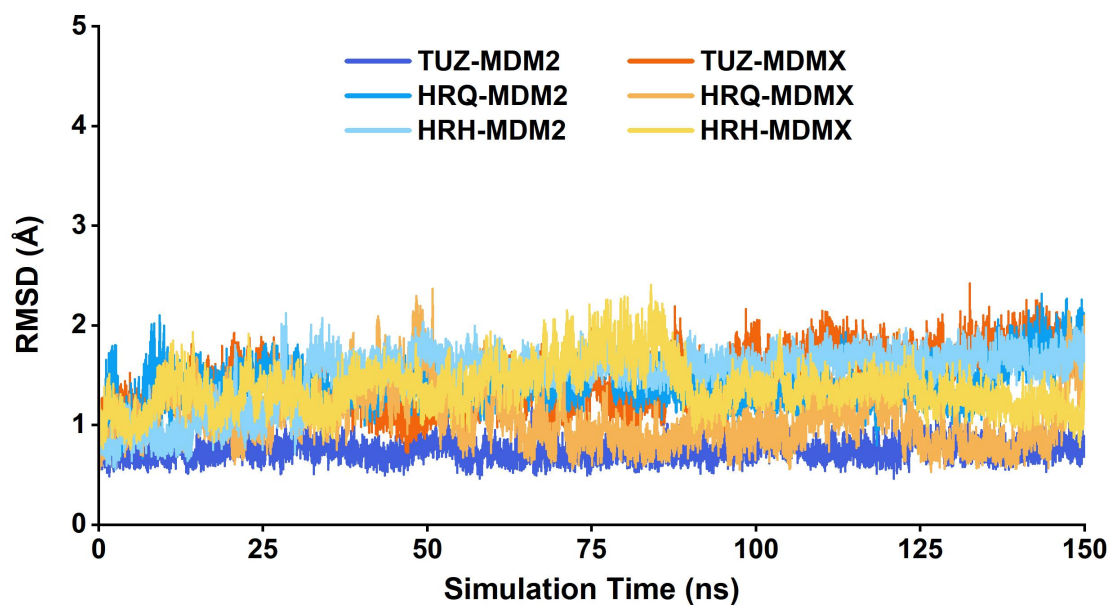

**Figure S3.** The root mean square deviation (RMSD) of the protein backbone atoms relative to the corresponding initial conformation for TUZ, HRQ, and HRH extended to 150 ns MD simulation, respectively.

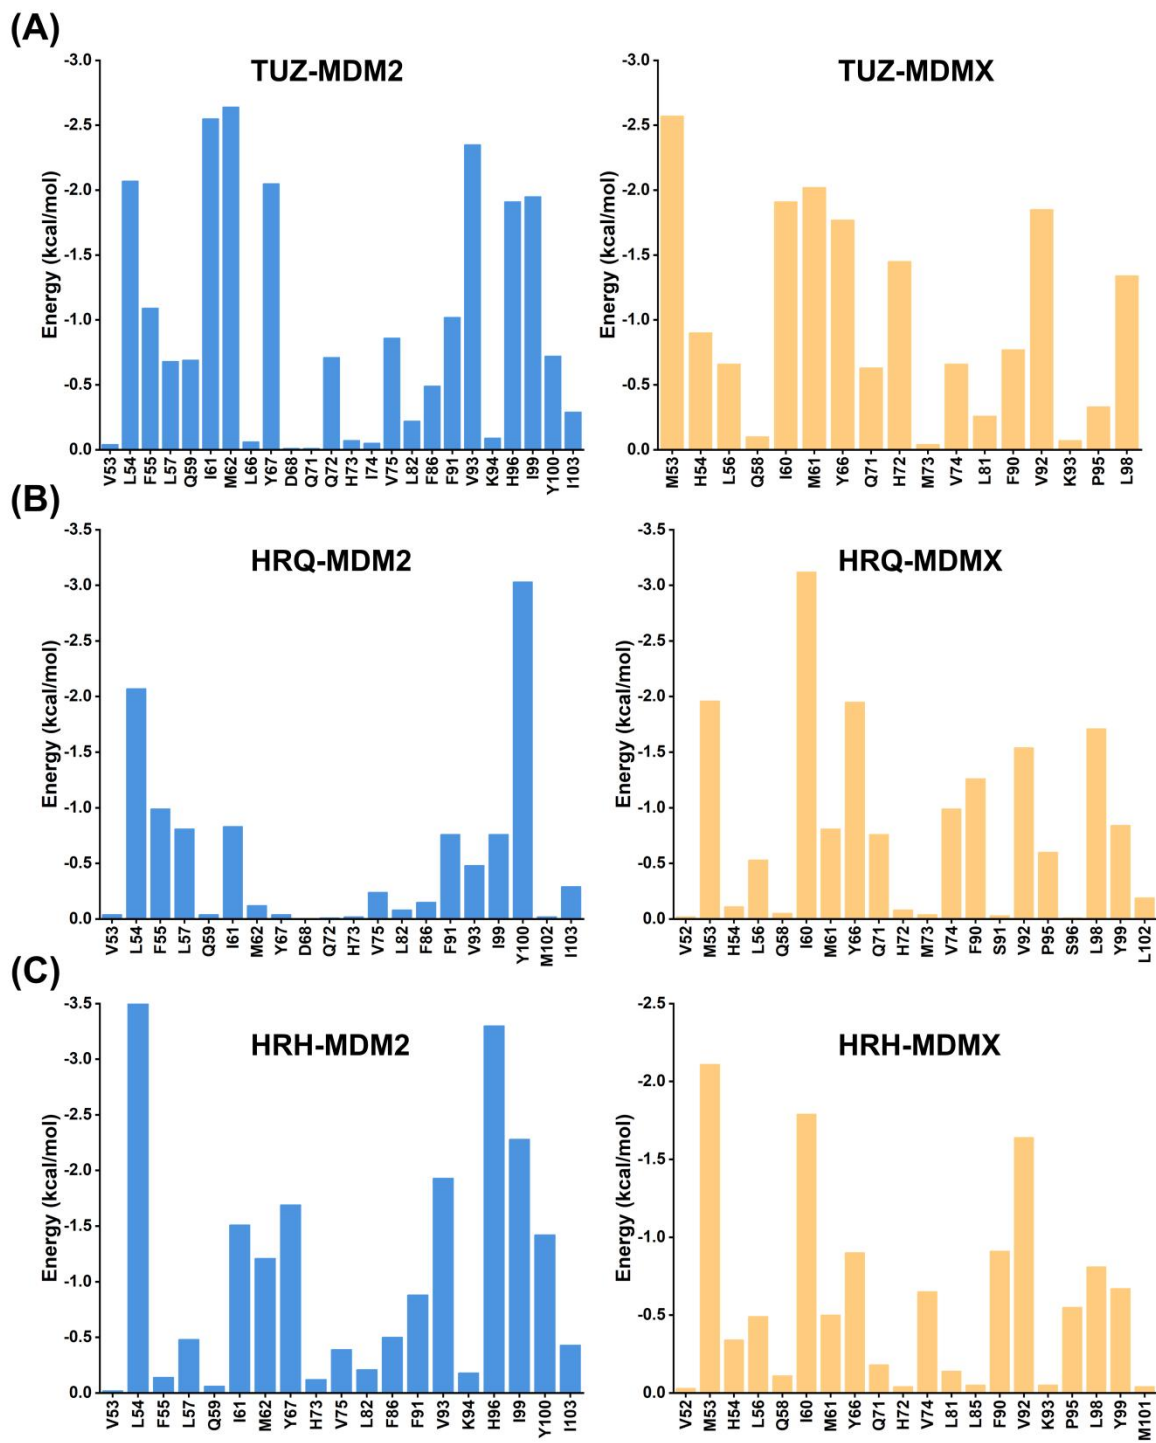

**Figure S4.** The van der Waals energy contributed by individual residues when (A) TUZ, (B) HRQ, and (C) HRH bind to MDM2 and MDMX, respectively.

**Table S1.** The binding free energy for each docking structure of inhibitors lacks a suitable crystal structure against MDM2/MDMX.

| Complex         | Structure | $\Delta E_{vdw}$ | $\Delta E_{ele}$ | $\Delta G_{gb}$ | $\Delta G_{ap}$ | $\Delta H$ | -TAS | $\Delta G_{bind}$ |
|-----------------|-----------|------------------|------------------|-----------------|-----------------|------------|------|-------------------|
| <b>2TZ—MDMX</b> | Docking 1 | -10.48           | -0.93            | 1.86            | -1.17           | -10.71     | 2.98 | -7.73             |
|                 | Docking 2 | -11.56           | 0.07             | 1.75            | -1.48           | -11.21     | 2.99 | -8.22             |
|                 | Docking 3 | -11.18           | -1.24            | 3.16            | -1.35           | -10.60     | 3.12 | -7.49             |
| <b>2U0—MDMX</b> | Docking 1 | -18.06           | -0.59            | 2.81            | -2.12           | -17.95     | 4.26 | -13.70            |
|                 | Docking 2 | -12.87           | -0.68            | 2.24            | -1.63           | -12.95     | 2.99 | -9.95             |
|                 | Docking 3 | -10.73           | -0.78            | 2.30            | -1.31           | -10.52     | 2.21 | -8.31             |
| <b>WW8—MDM2</b> | Docking 1 | -21.33           | -0.84            | 4.20            | -2.55           | -20.52     | 4.39 | -16.13            |
|                 | Docking 2 | -18.87           | -0.84            | 3.98            | -2.34           | -18.07     | 3.67 | -14.40            |
|                 | Docking 3 | -18.26           | -0.37            | 3.10            | -1.96           | -17.49     | 3.00 | -14.49            |
| <b>TUZ—MDMX</b> | Docking 1 | -13.28           | -0.22            | 1.68            | -1.36           | -13.18     | 2.62 | -10.57            |
|                 | Docking 2 | -13.88           | -1.20            | 3.25            | -1.31           | -13.14     | 2.79 | -10.35            |
|                 | Docking 3 | -17.81           | -1.49            | 3.61            | -2.16           | -17.86     | 3.85 | -14.01            |
| <b>TUW—MDMX</b> | Docking 1 | -12.89           | -4.47            | 5.54            | -1.80           | -13.63     | 4.42 | -9.21             |
|                 | Docking 2 | -13.77           | -1.70            | 3.59            | -1.53           | -13.41     | 3.29 | -10.12            |
|                 | Docking 3 | -15.65           | -0.98            | 3.43            | -1.68           | -14.88     | 3.26 | -11.62            |
| <b>TVH—MDM2</b> | Docking 1 | -20.02           | -0.75            | 3.05            | -2.14           | -19.86     | 4.27 | -15.60            |
|                 | Docking 2 | -15.97           | 0.76             | 1.27            | -1.64           | -15.57     | 3.50 | -12.06            |
|                 | Docking 3 | -18.66           | -0.88            | 2.88            | -2.08           | -18.74     | 3.74 | -15.00            |
| <b>TVH—MDMX</b> | Docking 1 | -12.55           | -0.48            | 1.89            | -1.40           | -12.54     | 2.86 | -9.68             |
|                 | Docking 2 | -12.68           | 0.23             | 0.74            | -1.22           | -12.92     | 2.94 | -9.98             |
|                 | Docking 3 | -10.50           | -2.14            | 2.69            | -1.35           | -11.30     | 2.98 | -8.32             |
| <b>TVK—MDMX</b> | Docking 2 | -14.19           | -0.65            | 3.10            | -1.33           | -13.06     | 2.60 | -10.46            |
|                 | Docking 3 | -13.31           | -1.46            | 3.34            | -1.64           | -13.08     | 3.63 | -9.44             |
|                 | Docking 3 | -13.20           | -1.18            | 3.60            | -1.48           | -12.26     | 3.15 | -9.11             |
| <b>U3Z—MDMX</b> | Docking 1 | -14.23           | -1.42            | 3.66            | -1.63           | -13.61     | 3.41 | -10.20            |
|                 | Docking 2 | -13.40           | -1.63            | 3.53            | -1.41           | -12.90     | 3.40 | -9.49             |
|                 | Docking 3 | -13.59           | -1.74            | 3.81            | -1.59           | -13.10     | 3.46 | -9.63             |
| <b>HRT—MDM2</b> | Docking 1 | -22.48           | -3.97            | 5.22            | -2.34           | -23.57     | 4.71 | -18.86            |
|                 | Docking 2 | -20.30           | -2.04            | 3.80            | -2.22           | -20.76     | 4.25 | -16.50            |
|                 | Docking 3 | -20.82           | -2.64            | 4.46            | -2.30           | -21.29     | 4.29 | -17.00            |
| <b>HRQ—MDM2</b> | Docking 1 | -10.98           | -3.12            | 3.95            | -1.53           | -11.69     | 3.98 | -7.71             |
|                 | Docking 2 | -13.24           | -0.97            | 3.08            | -1.14           | -12.28     | 2.28 | -10.00            |
|                 | Docking 3 | -10.53           | -1.17            | 2.39            | -1.18           | -10.49     | 2.37 | -8.12             |
| <b>HRH—MDMX</b> | Docking 1 | -14.17           | -0.53            | 2.09            | -1.69           | -14.30     | 2.74 | -11.56            |
|                 | Docking 2 | -8.66            | -0.48            | 1.25            | -1.02           | -8.89      | 1.77 | -7.12             |
|                 | Docking 3 | -15.21           | -0.38            | 2.00            | -1.84           | -15.43     | 3.57 | -11.86            |
| <b>HTZ—MDMX</b> | Docking 1 | -18.36           | -4.15            | 5.12            | -2.12           | -19.50     | 4.37 | -15.12            |
|                 | Docking 2 | -11.25           | -1.66            | 3.65            | -1.26           | -10.52     | 2.76 | -7.76             |
|                 | Docking 3 | -14.46           | -0.75            | 2.27            | -1.52           | -14.46     | 2.93 | -11.53            |
| <b>HU8—MDMX</b> | Docking 1 | -11.49           | -2.76            | 3.02            | -1.58           | -12.82     | 3.16 | -9.65             |
|                 | Docking 2 | -12.08           | 0.21             | 1.57            | -1.38           | -11.68     | 2.51 | -9.17             |
|                 | Docking 3 | -17.09           | -1.64            | 2.79            | -1.96           | -17.90     | 4.29 | -13.61            |

**Table S2.** Each energy terms of binding free energy of residues within 5 Å from the binding interface of P4–MDM2/MDMX obtained by the ASIE method (all values are in kcal/mol). The average results of the three trajectories are displayed.

| Systems     | Residues | $\Delta\Delta E_{vdW}$ | $\Delta\Delta E_{ele}$ | $\Delta\Delta G_{gb}$ | $\Delta\Delta G_{np}$ | $\Delta\Delta H$ | $-T\Delta\Delta S$ | $\Delta\Delta G_{bind}$ |
|-------------|----------|------------------------|------------------------|-----------------------|-----------------------|------------------|--------------------|-------------------------|
| <b>MDM2</b> | K51      | -0.83                  | -19.55                 | 17.90                 | -0.50                 | -2.97            | 3.21               | 0.24                    |
|             | V53      | -0.05                  | 0.07                   | -0.07                 | 0.00                  | -0.05            | 0.00               | -0.04                   |
|             | L54      | -3.06                  | -0.45                  | 1.04                  | -0.39                 | -2.86            | 0.37               | -2.49                   |
|             | F55      | -0.33                  | -0.14                  | 0.34                  | -0.01                 | -0.13            | 0.09               | -0.04                   |
|             | L57      | -0.78                  | 0.04                   | 0.08                  | -0.04                 | -0.70            | 0.14               | -0.55                   |
|             | Q59      | -0.14                  | -0.27                  | 0.32                  | 0.00                  | -0.09            | 0.11               | 0.01                    |
|             | I61      | -2.07                  | -0.07                  | 0.38                  | -0.22                 | -1.97            | 0.72               | -1.26                   |
|             | M62      | -2.15                  | -0.21                  | 1.11                  | -0.37                 | -1.61            | 1.28               | -0.33                   |
|             | Y67      | -3.18                  | -0.23                  | 0.46                  | -0.21                 | -3.17            | 0.43               | -2.74                   |
|             | Q71      | -0.07                  | -0.04                  | 0.06                  | 0.00                  | -0.04            | 0.02               | -0.02                   |
|             | Q72      | -2.54                  | -2.22                  | 1.54                  | -0.34                 | -3.56            | 0.83               | -2.73                   |
|             | H73      | -0.93                  | -0.62                  | 0.75                  | 0.00                  | -0.8             | -0.05              | -0.85                   |
|             | V75      | -0.69                  | -0.09                  | 0.17                  | -0.06                 | -0.68            | 0.08               | -0.59                   |
|             | F86      | -0.29                  | -0.09                  | 0.26                  | -0.01                 | -0.13            | 0.01               | -0.12                   |
|             | F91      | -0.69                  | -0.10                  | 0.44                  | -0.06                 | -0.41            | 0.06               | -0.35                   |
|             | V93      | -3.32                  | -0.08                  | 0.45                  | -0.43                 | -3.40            | 0.61               | -2.78                   |
|             | K94      | -1.02                  | -2.16                  | 2.13                  | -0.14                 | -1.19            | 0.36               | -0.83                   |
|             | E95      | -0.05                  | 3.97                   | -3.70                 | 0.00                  | 0.22             | 0.05               | 0.28                    |
|             | H96      | -2.49                  | -0.64                  | 0.93                  | -0.24                 | -2.45            | 0.56               | -1.88                   |
| I99         | -1.48    | -0.08                  | 0.20                   | -0.20                 | -1.56                 | 0.39             | -1.17              |                         |
| Y100        | -1.30    | -0.51                  | 0.64                   | -0.15                 | -1.32                 | 0.52             | -0.80              |                         |
| I103        | -0.64    | -0.11                  | 0.19                   | -0.06                 | -0.63                 | 0.04             | -0.59              |                         |
| <b>MDMX</b> | V49      | -0.09                  | -0.04                  | 0.08                  | 0.00                  | -0.05            | 0.02               | -0.03                   |
|             | K50      | -0.98                  | -24.61                 | 22.38                 | -0.64                 | -3.86            | 3.32               | -0.54                   |
|             | V52      | -0.05                  | 0.06                   | -0.06                 | 0.00                  | -0.05            | 0.00               | -0.04                   |
|             | M53      | -3.05                  | -2.03                  | 2.71                  | -0.35                 | -2.72            | 0.95               | -1.77                   |
|             | H54      | -0.72                  | 0.26                   | -0.07                 | -0.05                 | -0.58            | 0.16               | -0.42                   |
|             | L56      | -0.63                  | 0.03                   | 0.06                  | -0.02                 | -0.57            | 0.05               | -0.52                   |
|             | Q58      | -0.16                  | 0.17                   | -0.09                 | 0.00                  | -0.09            | 0.06               | -0.03                   |
|             | I60      | -1.93                  | -0.07                  | 0.37                  | -0.21                 | -1.84            | 0.64               | -1.21                   |
|             | M61      | -2.42                  | -0.43                  | 1.35                  | -0.39                 | -1.89            | 1.28               | -0.62                   |
|             | Y66      | -2.99                  | -0.15                  | 0.36                  | -0.16                 | -2.95            | 0.41               | -2.53                   |
|             | E70      | -0.02                  | -1.71                  | 1.56                  | -0.08                 | -0.24            | 0.60               | 0.35                    |
|             | Q71      | -2.59                  | -2.09                  | 1.53                  | -0.33                 | -3.49            | 0.81               | -2.67                   |
|             | H72      | -0.96                  | -0.10                  | 0.22                  | 0.00                  | -0.84            | 0.03               | -0.81                   |
|             | V74      | -0.72                  | -0.10                  | 0.19                  | -0.08                 | -0.71            | 0.10               | -0.61                   |
|             | F90      | -0.88                  | -0.20                  | 0.59                  | -0.10                 | -0.59            | 0.11               | -0.47                   |
|             | V92      | -3.41                  | -0.10                  | 0.55                  | -0.47                 | -3.44            | 0.73               | -2.71                   |
|             | K93      | -1.20                  | -1.49                  | 1.50                  | -0.16                 | -1.34            | 0.41               | -0.93                   |
|             | P95      | -0.65                  | -0.28                  | 0.27                  | -0.08                 | -0.75            | 0.25               | -0.50                   |
|             | L98      | -1.35                  | -0.16                  | 0.45                  | -0.23                 | -1.29            | 0.33               | -0.96                   |
| Y99         | -1.35    | -0.11                  | 0.39                   | -0.19                 | -1.26                 | 0.24             | -1.01              |                         |
| L102        | -0.14    | -0.17                  | 0.21                   | 0.00                  | -0.10                 | 0.01             | -0.10              |                         |

**Table S3.** Each energy terms of binding free energy of residues within 5 Å from the binding interface of pDI6W–MDM2/MDMX obtained by the ASIE method (all values are in kcal/mol). The average results of the three trajectories are displayed.

| Systems     | Residues | $\Delta\Delta E_{vdW}$ | $\Delta\Delta E_{ele}$ | $\Delta\Delta G_{gb}$ | $\Delta\Delta G_{np}$ | $\Delta\Delta H$ | $-\Delta\Delta S$ | $\Delta\Delta G_{bind}$ |
|-------------|----------|------------------------|------------------------|-----------------------|-----------------------|------------------|-------------------|-------------------------|
| <b>MDM2</b> | K51      | -0.88                  | -13.27                 | 12.24                 | -0.23                 | -2.14            | 1.71              | -0.43                   |
|             | V53      | -0.04                  | 0.06                   | -0.06                 | 0.00                  | -0.05            | 0.00              | -0.05                   |
|             | L54      | -2.93                  | -0.50                  | 0.84                  | -0.32                 | -2.91            | 0.41              | -2.50                   |
|             | F55      | -0.22                  | -0.10                  | 0.24                  | 0.00                  | -0.08            | 0.04              | -0.03                   |
|             | L57      | -0.76                  | 0.05                   | 0.06                  | -0.04                 | -0.68            | 0.10              | -0.57                   |
|             | Q59      | -0.15                  | -0.31                  | 0.35                  | -0.02                 | -0.13            | 0.18              | 0.05                    |
|             | I61      | -1.96                  | -0.07                  | 0.39                  | -0.21                 | -1.85            | 0.73              | -1.12                   |
|             | M62      | -2.37                  | -0.85                  | 1.67                  | -0.39                 | -1.93            | 1.35              | -0.58                   |
|             | Y67      | -3.11                  | -0.07                  | 0.26                  | -0.17                 | -3.08            | 0.32              | -2.76                   |
|             | Q72      | -2.57                  | -1.85                  | 1.48                  | -0.31                 | -3.26            | 0.91              | -2.35                   |
|             | H73      | -1.04                  | -0.80                  | 0.90                  | 0.03                  | -0.90            | -0.05             | -0.95                   |
|             | V75      | -0.74                  | -0.10                  | 0.17                  | -0.06                 | -0.73            | 0.08              | -0.65                   |
|             | F86      | -0.26                  | -0.07                  | 0.23                  | -0.01                 | -0.11            | 0.01              | -0.10                   |
|             | F91      | -0.69                  | -0.12                  | 0.46                  | -0.06                 | -0.41            | 0.05              | -0.36                   |
|             | V93      | -3.41                  | -0.12                  | 0.49                  | -0.44                 | -3.47            | 0.77              | -2.71                   |
|             | K94      | -2.08                  | -2.78                  | 2.69                  | -0.35                 | -2.53            | 0.57              | -1.97                   |
|             | E95      | -0.05                  | 4.00                   | -3.72                 | 0.00                  | 0.23             | 0.03              | 0.26                    |
|             | H96      | -2.47                  | -0.03                  | 0.31                  | -0.23                 | -2.42            | 0.49              | -1.93                   |
| I99         | -1.85    | -0.21                  | 0.35                   | -0.27                 | -2.00                 | 0.35             | -1.63             |                         |
| Y100        | -1.34    | -3.07                  | 2.47                   | -0.25                 | -2.18                 | 1.05             | -1.14             |                         |
| I103        | -0.36    | -0.10                  | 0.15                   | -0.02                 | -0.33                 | 0.01             | -0.32             |                         |
| <b>MDMX</b> | V49      | -0.36                  | -0.12                  | 0.29                  | -0.04                 | -0.22            | 0.11              | -0.12                   |
|             | K50      | -0.90                  | -16.71                 | 15.47                 | -0.33                 | -2.47            | 2.40              | -0.07                   |
|             | V52      | -0.05                  | 0.04                   | -0.05                 | 0.00                  | -0.05            | 0.00              | -0.05                   |
|             | M53      | -3.69                  | -2.25                  | 3.16                  | -0.47                 | -3.24            | 1.09              | -2.16                   |
|             | H54      | -0.28                  | 0.51                   | -0.39                 | -0.01                 | -0.16            | 0.05              | -0.11                   |
|             | L56      | -0.63                  | -0.01                  | 0.11                  | -0.02                 | -0.55            | 0.06              | -0.49                   |
|             | Q58      | -0.09                  | 0.37                   | -0.31                 | 0.00                  | -0.03            | 0.04              | 0.01                    |
|             | I60      | -1.87                  | -0.08                  | 0.38                  | -0.22                 | -1.79            | 0.57              | -1.22                   |
|             | M61      | -1.39                  | -0.12                  | 0.69                  | -0.22                 | -1.05            | 0.63              | -0.42                   |
|             | Y66      | -2.91                  | -0.22                  | 0.46                  | -0.24                 | -2.91            | 0.43              | -2.48                   |
|             | Q71      | -2.46                  | -2.81                  | 2.27                  | -0.34                 | -3.33            | 1.10              | -2.23                   |
|             | H72      | -1.03                  | -0.22                  | 0.30                  | 0.03                  | -0.92            | 0.03              | -0.89                   |
|             | M73      | -0.08                  | 0.21                   | -0.20                 | 0.00                  | -0.07            | 0.02              | -0.05                   |
|             | V74      | -0.69                  | -0.10                  | 0.19                  | -0.08                 | -0.67            | 0.12              | -0.56                   |
|             | F90      | -0.93                  | -0.23                  | 0.61                  | -0.09                 | -0.64            | 0.13              | -0.51                   |
|             | V92      | -3.44                  | -0.10                  | 0.53                  | -0.46                 | -3.48            | 0.88              | -2.60                   |
|             | K93      | -1.86                  | -1.91                  | 1.86                  | -0.30                 | -2.20            | 0.58              | -1.62                   |
|             | P95      | -0.56                  | -0.35                  | 0.32                  | -0.06                 | -0.65            | 0.25              | -0.41                   |
| L98         | -1.53    | -0.17                  | 0.50                   | -0.25                 | -1.44                 | 0.32             | -1.13             |                         |
| Y99         | -2.26    | -0.48                  | 0.68                   | -0.37                 | -2.44                 | 0.60             | -1.84             |                         |
| L102        | -0.19    | -0.21                  | 0.29                   | 0.00                  | -0.11                 | 0.02             | -0.09             |                         |



**Table S4.** Each energy terms of binding free energy of residues within 5 Å from the binding interface of 2TZ–MDM2/MDMX obtained by the ASIE method (all values are in kcal/mol). The average results of the three trajectories are displayed.

| Systems     | Residues | $\Delta\Delta E_{vdW}$ | $\Delta\Delta E_{ele}$ | $\Delta\Delta G_{gb}$ | $\Delta\Delta G_{np}$ | $\Delta\Delta H$ | $-T\Delta\Delta S$ | $\Delta\Delta G_{bind}$ |
|-------------|----------|------------------------|------------------------|-----------------------|-----------------------|------------------|--------------------|-------------------------|
| <b>MDM2</b> | V53      | -0.04                  | -0.01                  | 0.00                  | 0.00                  | -0.05            | 0.00               | -0.05                   |
|             | L54      | -2.21                  | -0.06                  | 0.35                  | -0.35                 | -2.28            | 0.54               | -1.74                   |
|             | F55      | -1.02                  | -0.05                  | 0.25                  | -0.15                 | -0.98            | 0.30               | -0.68                   |
|             | L57      | -0.61                  | -0.07                  | 0.10                  | -0.02                 | -0.61            | 0.03               | -0.57                   |
|             | Q59      | -0.61                  | -0.24                  | 0.36                  | -0.06                 | -0.56            | 0.17               | -0.40                   |
|             | I61      | -1.64                  | 0.00                   | 0.08                  | -0.21                 | -1.76            | 0.54               | -1.22                   |
|             | M62      | -1.70                  | -0.29                  | 0.47                  | -0.27                 | -1.8             | 0.48               | -1.33                   |
|             | Y67      | -1.19                  | -0.02                  | 0.15                  | -0.13                 | -1.19            | 0.18               | -1.01                   |
|             | H73      | -0.19                  | -0.01                  | 0.06                  | -0.01                 | -0.15            | 0.04               | -0.11                   |
|             | V75      | -0.37                  | 0.00                   | 0.02                  | -0.02                 | -0.36            | 0.01               | -0.35                   |
|             | L82      | -0.23                  | -0.02                  | 0.05                  | -0.01                 | -0.20            | 0.00               | -0.20                   |
|             | F86      | -0.54                  | -0.11                  | 0.20                  | -0.04                 | -0.49            | 0.04               | -0.45                   |
|             | F91      | -0.90                  | 0.19                   | 0.12                  | -0.08                 | -0.67            | 0.10               | -0.56                   |
|             | V93      | -1.60                  | -0.01                  | 0.33                  | -0.12                 | -1.40            | 0.19               | -1.21                   |
|             | K94      | -0.63                  | -0.89                  | 0.85                  | -0.11                 | -0.79            | 0.44               | -0.34                   |
|             | H96      | -3.46                  | -1.02                  | 0.92                  | -0.38                 | -3.94            | 1.06               | -2.88                   |
|             | I99      | -2.38                  | -0.07                  | 0.16                  | -0.27                 | -2.55            | 0.53               | -2.03                   |
| Y100        | -0.17    | 0.00                   | 0.01                   | 0.00                  | -0.16                 | 0.01             | -0.14              |                         |
| I103        | -0.55    | -0.01                  | 0.03                   | -0.04                 | -0.57                 | 0.03             | -0.54              |                         |
| <b>MDMX</b> | M53      | -1.97                  | 0.01                   | 0.19                  | -0.20                 | -1.97            | 0.42               | -1.55                   |
|             | H54      | -1.25                  | -0.54                  | 0.72                  | -0.14                 | -1.22            | 0.4                | -0.82                   |
|             | Y55      | -0.02                  | 0.00                   | 0.00                  | 0.00                  | -0.01            | 0.00               | -0.01                   |
|             | L56      | -0.43                  | 0.00                   | 0.01                  | -0.01                 | -0.43            | 0.06               | -0.37                   |
|             | Q58      | -0.36                  | 0.04                   | 0.04                  | -0.04                 | -0.33            | 0.12               | -0.21                   |
|             | Y59      | -0.01                  | 0.00                   | 0.00                  | 0.00                  | -0.01            | 0.00               | -0.01                   |
|             | I60      | -1.13                  | 0.02                   | 0.09                  | -0.15                 | -1.17            | 0.42               | -0.75                   |
|             | M61      | -0.78                  | -0.2                   | 0.44                  | -0.13                 | -0.67            | 0.34               | -0.33                   |
|             | Y66      | -0.70                  | -0.07                  | 0.19                  | -0.09                 | -0.67            | 0.18               | -0.49                   |
|             | Q71      | -0.14                  | -0.02                  | 0.06                  | -0.01                 | -0.12            | 0.03               | -0.09                   |
|             | H72      | -0.03                  | -0.04                  | 0.04                  | 0.00                  | -0.03            | 0.00               | -0.02                   |
|             | M73      | -0.02                  | 0.00                   | 0.00                  | 0.00                  | -0.02            | 0.00               | -0.02                   |
|             | V74      | -0.43                  | 0.00                   | 0.05                  | -0.05                 | -0.43            | 0.09               | -0.34                   |
|             | L81      | -0.06                  | 0.01                   | 0.00                  | 0.00                  | -0.05            | 0.00               | -0.05                   |
|             | F90      | -0.69                  | -0.01                  | 0.18                  | -0.08                 | -0.61            | 0.14               | -0.47                   |
|             | V92      | -1.51                  | 0.01                   | 0.20                  | -0.24                 | -1.55            | 0.39               | -1.16                   |
|             | K93      | -0.06                  | 0.09                   | -0.07                 | 0.00                  | -0.05            | 0.03               | -0.01                   |
| P95         | -0.51    | 0.01                   | 0.01                   | -0.05                 | -0.54                 | 0.10             | -0.44              |                         |
| L98         | -0.96    | 0.00                   | 0.12                   | -0.14                 | -0.97                 | 0.29             | -0.68              |                         |

**Table S5.** Each energy terms of binding free energy of residues within 5 Å from the binding interface of 2U0–MDM2/MDMX obtained by the ASIE method (all values are in kcal/mol). The average results of the three trajectories are displayed.

| Systems | Residues | $\Delta\Delta E_{vdW}$ | $\Delta\Delta E_{ele}$ | $\Delta\Delta G_{gb}$ | $\Delta\Delta G_{np}$ | $\Delta\Delta H$ | $-\Delta\Delta AS$ | $\Delta\Delta G_{bind}$ |
|---------|----------|------------------------|------------------------|-----------------------|-----------------------|------------------|--------------------|-------------------------|
| MDM2    | V53      | -0.03                  | -0.01                  | 0.00                  | 0.00                  | -0.05            | 0.00               | -0.05                   |
|         | L54      | -1.88                  | -0.10                  | 0.27                  | -0.25                 | -1.95            | 0.43               | -1.52                   |
|         | F55      | -1.30                  | -0.14                  | 0.22                  | -0.15                 | -1.36            | 0.32               | -1.04                   |
|         | L57      | -0.65                  | -0.08                  | 0.09                  | -0.04                 | -0.68            | 0.15               | -0.53                   |
|         | Q59      | -0.82                  | -0.12                  | 0.25                  | -0.08                 | -0.77            | 0.21               | -0.56                   |
|         | I61      | -1.85                  | 0.00                   | 0.05                  | -0.20                 | -2.01            | 0.51               | -1.49                   |
|         | M62      | -1.91                  | -0.59                  | 0.64                  | -0.30                 | -2.16            | 0.59               | -1.57                   |
|         | Y67      | -2.36                  | -0.10                  | 0.33                  | -0.26                 | -2.40            | 0.33               | -2.06                   |
|         | K70      | -0.21                  | 0.05                   | -0.02                 | 0.00                  | -0.19            | 0.03               | -0.16                   |
|         | H73      | -0.86                  | 0.07                   | 0.07                  | -0.10                 | -0.82            | 0.21               | -0.61                   |
|         | V75      | -0.51                  | -0.03                  | 0.04                  | -0.04                 | -0.55            | 0.02               | -0.52                   |
|         | F86      | -0.49                  | -0.13                  | 0.21                  | -0.03                 | -0.44            | 0.03               | -0.42                   |
|         | F91      | -0.66                  | -0.31                  | 0.39                  | -0.11                 | -0.69            | 0.27               | -0.42                   |
|         | V93      | -1.97                  | -0.11                  | 0.14                  | -0.08                 | -2.02            | 0.11               | -1.91                   |
|         | K94      | -1.24                  | -0.48                  | 0.52                  | -0.16                 | -1.36            | 0.67               | -0.68                   |
|         | H96      | -4.20                  | -1.20                  | 0.61                  | -0.20                 | -5.00            | 0.99               | -4.01                   |
| I99     | -2.48    | -0.06                  | 0.07                   | -0.28                 | -2.75                 | 0.53             | -2.23              |                         |
| Y100    | -0.34    | 0.00                   | 0.04                   | -0.02                 | -0.33                 | 0.08             | -0.25              |                         |
| I103    | -0.48    | -0.01                  | 0.03                   | -0.03                 | -0.50                 | 0.02             | -0.48              |                         |
| MDMX    | V52      | -0.02                  | -0.01                  | 0.00                  | 0.00                  | -0.02            | 0.00               | -0.02                   |
|         | M53      | -1.39                  | 0.11                   | 0.15                  | -0.17                 | -1.30            | 0.29               | -1.01                   |
|         | H54      | -1.05                  | -0.09                  | 0.28                  | -0.10                 | -0.97            | 0.18               | -0.79                   |
|         | L56      | -0.34                  | -0.02                  | 0.02                  | -0.01                 | -0.34            | 0.02               | -0.32                   |
|         | Q58      | -0.38                  | -0.05                  | 0.10                  | -0.03                 | -0.36            | 0.11               | -0.25                   |
|         | I60      | -1.38                  | 0.05                   | 0.05                  | -0.15                 | -1.44            | 0.34               | -1.10                   |
|         | M61      | -1.21                  | -0.12                  | 0.39                  | -0.18                 | -1.12            | 0.36               | -0.76                   |
|         | L65      | -0.03                  | -0.02                  | 0.02                  | 0.00                  | -0.04            | 0.00               | -0.04                   |
|         | Y66      | -2.54                  | -0.14                  | 0.38                  | -0.28                 | -2.57            | 0.53               | -2.04                   |
|         | Q71      | -0.83                  | 0.01                   | 0.14                  | -0.13                 | -0.81            | 0.26               | -0.56                   |
|         | H72      | -0.05                  | -0.04                  | 0.05                  | 0.00                  | -0.05            | 0.00               | -0.04                   |
|         | M73      | -0.02                  | 0.02                   | -0.03                 | 0.00                  | -0.03            | 0.00               | -0.03                   |
|         | V74      | -0.58                  | 0.01                   | 0.01                  | -0.06                 | -0.61            | 0.06               | -0.56                   |
|         | L81      | -0.09                  | 0.00                   | 0.01                  | 0.00                  | -0.08            | 0.00               | -0.08                   |
|         | L85      | -0.04                  | 0.00                   | 0.01                  | 0.00                  | -0.03            | 0.00               | -0.03                   |
|         | F90      | -0.77                  | -0.09                  | 0.25                  | -0.08                 | -0.69            | 0.10               | -0.60                   |
| S91     | 0.00     | -0.01                  | 0.01                   | 0.00                  | -0.01                 | 0.00             | -0.01              |                         |
| K93     | -0.08    | 0.11                   | -0.09                  | 0.00                  | -0.07                 | 0.04             | -0.03              |                         |
| P95     | -0.26    | -0.02                  | 0.00                   | -0.03                 | -0.31                 | 0.05             | -0.26              |                         |
| L98     | -0.96    | -0.02                  | 0.15                   | -0.16                 | -0.98                 | 0.31             | -0.67              |                         |

**Table S6.** Each energy terms of binding free energy of residues within 5 Å from the binding interface of WW8–MDM2/MDMX obtained by the ASIE method (all values are in kcal/mol). The average results of the three trajectories are displayed.

| Systems     | Residues | $\Delta A E_{vdW}$ | $\Delta A E_{ele}$ | $\Delta A G_{gb}$ | $\Delta A G_{np}$ | $\Delta A H$ | $-T\Delta A S$ | $\Delta A G_{bind}$ |
|-------------|----------|--------------------|--------------------|-------------------|-------------------|--------------|----------------|---------------------|
| <b>MDM2</b> | V53      | -0.02              | -0.01              | 0.00              | 0.00              | -0.03        | 0.00           | -0.03               |
|             | L54      | -2.68              | -0.13              | 0.55              | -0.31             | -2.57        | 0.48           | -2.09               |
|             | F55      | -0.95              | -0.10              | 0.30              | -0.11             | -0.87        | 0.31           | -0.56               |
|             | L57      | -0.76              | -0.06              | 0.11              | -0.04             | -0.74        | 0.05           | -0.69               |
|             | Q59      | -0.22              | -0.02              | 0.08              | -0.01             | -0.17        | 0.03           | -0.14               |
|             | I61      | -1.87              | -0.01              | 0.24              | -0.23             | -1.87        | 0.52           | -1.35               |
|             | M62      | -1.76              | -0.07              | 0.48              | -0.29             | -1.64        | 0.36           | -1.27               |
|             | L66      | -0.03              | -0.02              | 0.01              | 0.00              | -0.04        | 0.00           | -0.04               |
|             | Y67      | -1.83              | -0.10              | 0.28              | -0.26             | -1.91        | 0.27           | -1.64               |
|             | E69      | -0.05              | -0.05              | 0.07              | 0.00              | -0.03        | 0.01           | -0.03               |
|             | Q72      | -0.39              | 0.10               | 0.01              | -0.06             | -0.34        | 0.07           | -0.27               |
|             | H73      | -0.10              | 0.00               | 0.03              | 0.00              | -0.07        | 0.01           | -0.06               |
|             | I74      | -0.03              | 0.00               | -0.01             | 0.00              | -0.04        | 0.00           | -0.04               |
|             | V75      | -0.63              | -0.01              | 0.10              | -0.06             | -0.60        | 0.07           | -0.53               |
|             | L82      | -0.10              | -0.01              | 0.03              | -0.01             | -0.09        | 0.00           | -0.09               |
|             | F86      | -0.56              | -0.12              | 0.25              | -0.05             | -0.48        | 0.08           | -0.40               |
|             | F91      | -0.95              | 0.04               | 0.30              | -0.10             | -0.71        | 0.21           | -0.49               |
|             | S92      | -0.01              | 0.00               | 0.00              | 0.00              | -0.01        | 0.00           | -0.01               |
|             | V93      | -1.74              | 0.01               | 0.25              | -0.21             | -1.69        | 0.33           | -1.37               |
|             | K94      | -0.06              | -0.06              | 0.07              | 0.00              | -0.05        | 0.01           | -0.05               |
| H96         | -0.93    | 0.08               | 0.04               | -0.08             | -0.88             | 0.13         | -0.75          |                     |
| I99         | -2.04    | -0.08              | 0.26               | -0.25             | -2.12             | 0.50         | -1.62          |                     |
| Y100        | -1.24    | -0.04              | 0.25               | -0.18             | -1.21             | 0.21         | -1.00          |                     |
| M102        | -0.02    | -0.03              | 0.04               | 0.00              | -0.02             | 0.00         | -0.02          |                     |
| I103        | -0.50    | -0.01              | 0.05               | -0.03             | -0.50             | 0.03         | -0.47          |                     |
| <b>MDMX</b> | V52      | -0.04              | 0.00               | -0.01             | 0.00              | -0.05        | 0.00           | -0.05               |
|             | M53      | -2.15              | -0.42              | 0.75              | -0.27             | -2.08        | 0.44           | -1.65               |
|             | H54      | -0.90              | -0.08              | 0.21              | -0.09             | -0.87        | 0.22           | -0.65               |
|             | L56      | -0.84              | -0.02              | 0.09              | -0.05             | -0.82        | 0.04           | -0.78               |
|             | Q58      | -0.24              | -0.09              | 0.14              | -0.01             | -0.19        | 0.02           | -0.16               |
|             | I60      | -2.09              | -0.05              | 0.31              | -0.25             | -2.08        | 0.66           | -1.41               |
|             | M61      | -1.76              | -0.04              | 0.40              | -0.30             | -1.70        | 0.35           | -1.34               |
|             | Y66      | -1.89              | -0.05              | 0.29              | -0.29             | -1.94        | 0.35           | -1.59               |
|             | Q71      | -0.59              | -0.02              | 0.13              | -0.08             | -0.57        | 0.12           | -0.45               |
|             | H72      | -0.38              | -0.07              | 0.12              | -0.02             | -0.35        | 0.07           | -0.28               |
|             | V74      | -1.15              | 0.04               | 0.19              | -0.14             | -1.06        | 0.18           | -0.88               |
|             | L81      | -0.40              | -0.05              | 0.09              | -0.04             | -0.39        | 0.02           | -0.38               |
|             | F90      | -1.37              | 0.09               | 0.35              | -0.17             | -1.09        | 0.26           | -0.83               |
|             | V92      | -2.92              | -0.09              | 0.52              | -0.31             | -2.80        | 0.66           | -2.14               |
|             | P95      | -0.34              | -0.05              | 0.01              | -0.03             | -0.41        | 0.10           | -0.31               |
|             | L98      | -1.81              | -0.06              | 0.30              | -0.27             | -1.85        | 0.49           | -1.35               |
| Y99         | -0.75    | 0.04               | 0.09               | -0.10             | -0.72             | 0.14         | -0.58          |                     |

**Table S7.** Each energy terms of binding free energy of residues within 5 Å from the binding interface of TUZ–MDM2/MDMX obtained by the ASIE method (all values are in kcal/mol). The average results of the three trajectories are displayed.

| Systems     | Residues | $\Delta\Delta E_{vdW}$ | $\Delta\Delta E_{ele}$ | $\Delta\Delta G_{gb}$ | $\Delta\Delta G_{np}$ | $\Delta\Delta H$ | $-T\Delta\Delta S$ | $\Delta\Delta G_{bind}$ |
|-------------|----------|------------------------|------------------------|-----------------------|-----------------------|------------------|--------------------|-------------------------|
| <b>MDM2</b> | V53      | -0.04                  | -0.02                  | 0.01                  | 0.00                  | -0.05            | 0.00               | -0.04                   |
|             | L54      | -2.03                  | -0.15                  | 0.45                  | -0.20                 | -1.94            | 0.61               | -1.33                   |
|             | F55      | -1.35                  | -0.53                  | 0.81                  | -0.15                 | -1.21            | 0.55               | -0.66                   |
|             | L57      | -0.77                  | -0.04                  | 0.08                  | -0.04                 | -0.77            | 0.11               | -0.66                   |
|             | Q59      | -0.63                  | -0.12                  | 0.22                  | -0.06                 | -0.59            | 0.15               | -0.45                   |
|             | I61      | -2.45                  | 0.07                   | 0.05                  | -0.22                 | -2.55            | 0.28               | -2.27                   |
|             | M62      | -2.58                  | -0.55                  | 0.83                  | -0.38                 | -2.68            | 0.56               | -2.12                   |
|             | L66      | -0.05                  | -0.06                  | 0.05                  | 0.00                  | -0.06            | 0.00               | -0.06                   |
|             | Y67      | -1.93                  | -0.27                  | 0.33                  | -0.23                 | -2.10            | 0.40               | -1.70                   |
|             | D68      | -0.01                  | -0.51                  | 0.48                  | 0.00                  | -0.03            | 0.01               | -0.03                   |
|             | Q71      | -0.01                  | 0.01                   | -0.01                 | 0.00                  | -0.01            | 0.00               | -0.01                   |
|             | Q72      | -0.76                  | -0.13                  | 0.20                  | -0.10                 | -0.80            | 0.15               | -0.65                   |
|             | H73      | -0.07                  | -0.10                  | 0.09                  | 0.00                  | -0.07            | 0.01               | -0.06                   |
|             | I74      | -0.04                  | -0.07                  | 0.06                  | 0.00                  | -0.05            | 0.00               | -0.04                   |
|             | V75      | -0.70                  | 0.01                   | 0.05                  | -0.05                 | -0.70            | 0.05               | -0.65                   |
|             | L82      | -0.25                  | 0.00                   | 0.04                  | -0.01                 | -0.22            | 0.00               | -0.21                   |
|             | F86      | -0.53                  | -0.08                  | 0.16                  | -0.03                 | -0.48            | 0.02               | -0.45                   |
|             | F91      | -1.02                  | 0.08                   | 0.21                  | -0.09                 | -0.81            | 0.12               | -0.69                   |
|             | V93      | -2.24                  | 0.00                   | 0.35                  | -0.24                 | -2.12            | 0.39               | -1.73                   |
|             | K94      | -0.10                  | -0.13                  | 0.14                  | 0.00                  | -0.09            | 0.04               | -0.06                   |
| H96         | -1.86    | -0.04                  | 0.22                   | -0.20                 | -1.89                 | 0.39             | -1.50              |                         |
| I99         | -1.96    | -0.04                  | 0.11                   | -0.22                 | -2.11                 | 0.45             | -1.66              |                         |
| Y100        | -0.77    | -0.01                  | 0.08                   | -0.05                 | -0.75                 | 0.18             | -0.56              |                         |
| I103        | -0.38    | -0.01                  | 0.02                   | -0.02                 | -0.38                 | 0.01             | -0.36              |                         |
| <b>MDMX</b> | M53      | -1.20                  | -0.25                  | 0.43                  | -0.17                 | -1.19            | 0.32               | -0.87                   |
|             | H54      | -0.90                  | -0.29                  | 0.36                  | -0.09                 | -0.92            | 0.23               | -0.69                   |
|             | Y55      | -0.02                  | 0.00                   | 0.00                  | 0.00                  | -0.02            | 0.00               | -0.02                   |
|             | L56      | -0.35                  | 0.00                   | 0.01                  | -0.01                 | -0.35            | 0.05               | -0.30                   |
|             | Q58      | -0.58                  | -0.10                  | 0.17                  | -0.05                 | -0.57            | 0.16               | -0.41                   |
|             | I60      | -1.70                  | 0.03                   | 0.20                  | -0.14                 | -1.61            | 0.31               | -1.30                   |
|             | M61      | -2.21                  | -0.17                  | 0.64                  | -0.32                 | -2.06            | 0.58               | -1.48                   |
|             | Y66      | -2.42                  | -0.09                  | 0.27                  | -0.23                 | -2.48            | 0.34               | -2.14                   |
|             | Q71      | -0.37                  | -0.09                  | 0.14                  | -0.05                 | -0.37            | 0.14               | -0.23                   |
|             | H72      | -0.25                  | -0.05                  | 0.06                  | -0.01                 | -0.25            | 0.05               | -0.20                   |
|             | M73      | -0.05                  | -0.03                  | 0.02                  | 0.00                  | -0.06            | 0.00               | -0.06                   |
|             | V74      | -0.68                  | -0.02                  | 0.07                  | -0.05                 | -0.68            | 0.10               | -0.58                   |
|             | L81      | -0.01                  | 0.00                   | 0.00                  | 0.00                  | -0.01            | 0.00               | -0.01                   |
|             | F90      | -0.53                  | 0.02                   | 0.12                  | -0.04                 | -0.43            | 0.05               | -0.38                   |
|             | S91      | 0.00                   | 0.01                   | -0.01                 | 0.00                  | -0.01            | 0.00               | -0.01                   |
|             | V92      | -2.25                  | 0.00                   | 0.27                  | -0.23                 | -2.21            | 0.41               | -1.80                   |
|             | K93      | -0.17                  | 0.07                   | -0.05                 | -0.02                 | -0.17            | 0.03               | -0.14                   |
|             | P95      | -0.29                  | -0.02                  | 0.02                  | -0.03                 | -0.33            | 0.06               | -0.26                   |
|             | L98      | -0.84                  | 0.01                   | 0.10                  | -0.13                 | -0.85            | 0.23               | -0.62                   |

|      |       |      |      |       |       |      |       |
|------|-------|------|------|-------|-------|------|-------|
| Y99  | -0.15 | 0.00 | 0.02 | -0.02 | -0.14 | 0.01 | -0.13 |
| L102 | -0.03 | 0.00 | 0.00 | 0.00  | -0.03 | 0.00 | -0.03 |

---

**Table S8.** Each energy terms of binding free energy of residues within 5 Å from the binding interface of TUW–MDM2/MDMX obtained by the ASIE method (all values are in kcal/mol). The average results of the three trajectories are displayed.

| Systems     | Residues | $\Delta\Delta E_{vdW}$ | $\Delta\Delta E_{ele}$ | $\Delta\Delta G_{gb}$ | $\Delta\Delta G_{np}$ | $\Delta\Delta H$ | $-T\Delta\Delta S$ | $\Delta\Delta G_{bind}$ |
|-------------|----------|------------------------|------------------------|-----------------------|-----------------------|------------------|--------------------|-------------------------|
| <b>MDM2</b> | V53      | -0.04                  | -0.01                  | 0.01                  | 0.00                  | -0.05            | 0.00               | -0.05                   |
|             | L54      | -2.26                  | 0.04                   | 0.45                  | -0.28                 | -2.06            | 0.46               | -1.59                   |
|             | F55      | -1.01                  | -0.16                  | 0.38                  | -0.13                 | -0.91            | 0.40               | -0.51                   |
|             | Y56      | -0.06                  | 0.00                   | 0.01                  | 0.00                  | -0.05            | 0.00               | -0.05                   |
|             | L57      | -0.73                  | -0.03                  | 0.07                  | -0.04                 | -0.72            | 0.09               | -0.63                   |
|             | Q59      | -0.84                  | -0.05                  | 0.18                  | -0.09                 | -0.80            | 0.17               | -0.63                   |
|             | I61      | -2.52                  | 0.06                   | 0.07                  | -0.22                 | -2.61            | 0.31               | -2.30                   |
|             | M62      | -2.32                  | -0.52                  | 0.85                  | -0.35                 | -2.33            | 0.62               | -1.71                   |
|             | L66      | -0.06                  | -0.06                  | 0.05                  | 0.00                  | -0.07            | 0.00               | -0.06                   |
|             | Y67      | -1.67                  | -0.13                  | 0.25                  | -0.22                 | -1.76            | 0.31               | -1.46                   |
|             | D68      | -0.01                  | -0.49                  | 0.47                  | 0.00                  | -0.04            | 0.01               | -0.03                   |
|             | Q71      | -0.01                  | 0.00                   | 0.01                  | 0.00                  | -0.01            | 0.00               | -0.01                   |
|             | Q72      | -0.35                  | -0.01                  | 0.05                  | -0.04                 | -0.34            | 0.06               | -0.28                   |
|             | H73      | -0.08                  | -0.11                  | 0.10                  | 0.00                  | -0.08            | 0.02               | -0.07                   |
|             | I74      | -0.06                  | -0.07                  | 0.04                  | 0.00                  | -0.09            | 0.01               | -0.07                   |
|             | V75      | -1.01                  | 0.01                   | 0.07                  | -0.09                 | -1.01            | 0.10               | -0.92                   |
|             | L82      | -0.21                  | -0.01                  | 0.04                  | 0.00                  | -0.18            | 0.00               | -0.18                   |
|             | F86      | -0.52                  | -0.07                  | 0.16                  | -0.04                 | -0.47            | 0.02               | -0.46                   |
|             | F91      | -1.05                  | 0.08                   | 0.26                  | -0.11                 | -0.83            | 0.19               | -0.64                   |
|             | V93      | -2.38                  | 0.00                   | 0.41                  | -0.23                 | -2.19            | 0.37               | -1.83                   |
| K94         | -0.11    | -0.13                  | 0.14                   | 0.00                  | -0.10                 | 0.03             | -0.07              |                         |
| H96         | -2.04    | 0.01                   | 0.09                   | -0.21                 | -2.15                 | 0.36             | -1.79              |                         |
| I99         | -2.35    | -0.03                  | 0.22                   | -0.26                 | -2.42                 | 0.40             | -2.02              |                         |
| Y100        | -0.68    | -0.26                  | 0.30                   | -0.07                 | -0.72                 | 0.18             | -0.55              |                         |
| I103        | -0.32    | -0.02                  | 0.04                   | -0.01                 | -0.32                 | 0.01             | -0.31              |                         |
| <b>MDMX</b> | M53      | -0.78                  | -0.27                  | 0.42                  | -0.13                 | -0.76            | 0.26               | -0.50                   |
|             | H54      | -1.41                  | -0.31                  | 0.58                  | -0.20                 | -1.33            | 0.30               | -1.03                   |
|             | Y55      | -0.03                  | -0.01                  | 0.01                  | 0.00                  | -0.02            | 0.00               | -0.02                   |
|             | L56      | -0.19                  | -0.02                  | 0.02                  | 0.00                  | -0.19            | 0.02               | -0.18                   |
|             | Q58      | -0.49                  | -0.68                  | 0.66                  | -0.08                 | -0.59            | 0.33               | -0.27                   |
|             | I60      | -1.47                  | -0.05                  | 0.36                  | -0.11                 | -1.27            | 0.29               | -0.98                   |
|             | M61      | -2.02                  | -0.11                  | 0.53                  | -0.25                 | -1.85            | 0.54               | -1.31                   |
|             | Y66      | -2.77                  | -1.16                  | 1.08                  | -0.30                 | -3.15            | 0.93               | -2.22                   |
|             | Q71      | -0.87                  | 0.04                   | 0.07                  | -0.13                 | -0.88            | 0.23               | -0.65                   |
|             | H72      | -0.13                  | 0.05                   | -0.03                 | 0.00                  | -0.12            | 0.01               | -0.11                   |
|             | M73      | -0.03                  | -0.05                  | 0.04                  | 0.00                  | -0.03            | 0.00               | -0.03                   |
|             | V74      | -0.34                  | 0.00                   | 0.05                  | -0.02                 | -0.31            | 0.02               | -0.29                   |
|             | F90      | -0.36                  | 0.04                   | 0.07                  | -0.03                 | -0.29            | 0.04               | -0.24                   |
|             | S91      | -0.01                  | -0.01                  | 0.01                  | 0.00                  | -0.01            | 0.00               | -0.01                   |
|             | V92      | -1.91                  | 0.04                   | 0.26                  | -0.23                 | -1.84            | 0.34               | -1.50                   |
|             | K93      | -0.09                  | 0.04                   | -0.03                 | 0.00                  | -0.08            | 0.02               | -0.06                   |
|             | P95      | -0.41                  | -0.01                  | 0.01                  | -0.06                 | -0.47            | 0.10               | -0.37                   |
|             | L98      | -0.71                  | 0.01                   | 0.10                  | -0.12                 | -0.72            | 0.22               | -0.50                   |

|      |       |      |       |      |       |      |       |
|------|-------|------|-------|------|-------|------|-------|
| Y99  | -0.05 | 0.00 | 0.01  | 0.00 | -0.04 | 0.00 | -0.03 |
| L102 | -0.01 | 0.01 | -0.01 | 0.00 | -0.01 | 0.00 | -0.01 |

---

**Table S9.** Each energy terms of binding free energy of residues within 5 Å from the binding interface of TVH–MDM2/MDMX obtained by the ASIE method (all values are in kcal/mol). The average results of the three trajectories are displayed.

| Systems | Residues | $\Delta\Delta E_{vdW}$ | $\Delta\Delta E_{ele}$ | $\Delta\Delta G_{gb}$ | $\Delta\Delta G_{np}$ | $\Delta\Delta H$ | $-T\Delta\Delta S$ | $\Delta\Delta G_{bind}$ |
|---------|----------|------------------------|------------------------|-----------------------|-----------------------|------------------|--------------------|-------------------------|
| MDM2    | L54      | -2.13                  | -0.09                  | 0.39                  | -0.26                 | -2.09            | 0.51               | -1.57                   |
|         | F55      | -0.82                  | -0.07                  | 0.27                  | -0.09                 | -0.71            | 0.30               | -0.41                   |
|         | L57      | -0.79                  | -0.01                  | 0.08                  | -0.05                 | -0.78            | 0.10               | -0.68                   |
|         | Q59      | -0.75                  | -0.09                  | 0.18                  | -0.08                 | -0.75            | 0.18               | -0.57                   |
|         | I61      | -2.23                  | 0.03                   | 0.10                  | -0.20                 | -2.30            | 0.43               | -1.87                   |
|         | M62      | -1.42                  | -0.08                  | 0.25                  | -0.21                 | -1.46            | 0.38               | -1.08                   |
|         | Y67      | -1.86                  | -0.14                  | 0.27                  | -0.19                 | -1.93            | 0.32               | -1.61                   |
|         | D68      | -0.01                  | 0.10                   | -0.09                 | 0.00                  | 0.00             | 0.00               | 0.01                    |
|         | Q72      | -0.35                  | -0.04                  | 0.08                  | -0.04                 | -0.35            | 0.09               | -0.26                   |
|         | H73      | -0.09                  | -0.05                  | 0.06                  | 0.00                  | -0.08            | 0.01               | -0.07                   |
|         | I74      | -0.02                  | 0.00                   | 0.00                  | 0.00                  | -0.02            | 0.00               | -0.02                   |
|         | V75      | -0.59                  | 0.00                   | 0.05                  | -0.05                 | -0.59            | 0.04               | -0.55                   |
|         | F86      | -0.49                  | -0.05                  | 0.15                  | -0.04                 | -0.43            | 0.03               | -0.40                   |
|         | F91      | -0.94                  | 0.06                   | 0.22                  | -0.09                 | -0.76            | 0.12               | -0.65                   |
|         | S92      | -0.01                  | -0.01                  | 0.01                  | 0.00                  | -0.01            | 0.00               | -0.01                   |
|         | V93      | -1.74                  | 0.02                   | 0.19                  | -0.24                 | -1.76            | 0.53               | -1.22                   |
|         | K94      | -0.08                  | -0.10                  | 0.11                  | 0.00                  | -0.07            | 0.02               | -0.05                   |
|         | H96      | -0.96                  | -0.03                  | 0.10                  | -0.08                 | -0.96            | 0.20               | -0.77                   |
| I99     | -1.80    | -0.05                  | 0.16                   | -0.21                 | -1.90                 | 0.32             | -1.58              |                         |
| Y100    | -0.73    | -0.04                  | 0.14                   | -0.10                 | -0.73                 | 0.19             | -0.54              |                         |
| I103    | -0.38    | -0.01                  | 0.03                   | -0.03                 | -0.38                 | 0.03             | -0.35              |                         |
| MDMX    | V52      | -0.02                  | -0.01                  | 0.00                  | 0.00                  | -0.03            | 0.00               | -0.03                   |
|         | M53      | -1.33                  | -0.09                  | 0.20                  | -0.13                 | -1.34            | 0.32               | -1.02                   |
|         | H54      | -0.73                  | 0.03                   | 0.08                  | -0.06                 | -0.67            | 0.06               | -0.61                   |
|         | L56      | -0.25                  | -0.03                  | 0.03                  | 0.00                  | -0.24            | -0.01              | -0.25                   |
|         | Q58      | -0.07                  | 0.01                   | 0.01                  | 0.00                  | -0.05            | 0.01               | -0.05                   |
|         | Y59      | -0.02                  | -0.01                  | 0.00                  | 0.00                  | -0.02            | 0.00               | -0.02                   |
|         | I60      | -1.73                  | -0.03                  | 0.16                  | -0.19                 | -1.78            | 0.41               | -1.38                   |
|         | M61      | -1.36                  | -0.11                  | 0.26                  | -0.18                 | -1.40            | 0.43               | -0.96                   |
|         | L65      | -0.01                  | 0.00                   | -0.01                 | 0.00                  | -0.02            | 0.00               | -0.02                   |
|         | Y66      | -1.50                  | -0.35                  | 0.45                  | -0.24                 | -1.64            | 0.58               | -1.06                   |
|         | Q71      | -0.10                  | -0.02                  | 0.04                  | -0.01                 | -0.08            | 0.01               | -0.07                   |
|         | H72      | -0.06                  | -0.02                  | 0.02                  | 0.00                  | -0.06            | 0.00               | -0.07                   |
|         | M73      | -0.01                  | 0.01                   | -0.01                 | 0.00                  | -0.01            | 0.00               | -0.01                   |
|         | V74      | -0.50                  | -0.02                  | 0.07                  | -0.04                 | -0.49            | 0.07               | -0.42                   |
|         | L81      | -0.08                  | -0.01                  | 0.02                  | 0.00                  | -0.07            | 0.00               | -0.07                   |
|         | L85      | -0.05                  | -0.01                  | 0.02                  | 0.00                  | -0.04            | 0.00               | -0.04                   |
|         | F90      | -0.53                  | -0.16                  | 0.25                  | -0.06                 | -0.50            | 0.10               | -0.40                   |
|         | V92      | -1.11                  | -0.04                  | 0.09                  | -0.14                 | -1.20            | 0.20               | -1.00                   |
| K93     | -0.06    | 0.05                   | -0.04                  | 0.00                  | -0.05                 | 0.01             | -0.04              |                         |
| P95     | -1.14    | 0.01                   | -0.04                  | -0.10                 | -1.27                 | 0.26             | -1.01              |                         |
| L98     | -0.87    | -0.07                  | 0.17                   | -0.14                 | -0.91                 | 0.42             | -0.48              |                         |
| Y99     | -0.34    | -0.01                  | 0.06                   | -0.04                 | -0.33                 | 0.05             | -0.28              |                         |



|      |       |       |      |      |       |      |       |
|------|-------|-------|------|------|-------|------|-------|
| M101 | -0.03 | -0.04 | 0.04 | 0.00 | -0.03 | 0.00 | -0.03 |
| L102 | -0.03 | 0.00  | 0.00 | 0.00 | -0.02 | 0.00 | -0.02 |

---

**Table S10.** Each energy terms of binding free energy of residues within 5 Å from the binding interface of TVK–MDM2/MDMX obtained by the ASIE method (all values are in kcal/mol). The average results of the three trajectories are displayed.

| Systems     | Residues | $\Delta\Delta E_{vdW}$ | $\Delta\Delta E_{ele}$ | $\Delta\Delta G_{gb}$ | $\Delta\Delta G_{np}$ | $\Delta\Delta H$ | $-T\Delta\Delta S$ | $\Delta\Delta G_{bind}$ |
|-------------|----------|------------------------|------------------------|-----------------------|-----------------------|------------------|--------------------|-------------------------|
| <b>MDM2</b> | V53      | -0.04                  | -0.01                  | -0.01                 | 0.00                  | -0.05            | 0.00               | -0.05                   |
|             | L54      | -2.11                  | -0.11                  | 0.43                  | -0.21                 | -1.99            | 0.63               | -1.37                   |
|             | F55      | -1.01                  | -0.21                  | 0.47                  | -0.14                 | -0.90            | 0.40               | -0.50                   |
|             | Y56      | -0.06                  | 0.00                   | 0.01                  | 0.00                  | -0.05            | 0.00               | -0.05                   |
|             | L57      | -0.70                  | -0.03                  | 0.07                  | -0.03                 | -0.69            | 0.05               | -0.64                   |
|             | Q59      | -0.68                  | -0.11                  | 0.21                  | -0.07                 | -0.65            | 0.13               | -0.52                   |
|             | I61      | -2.48                  | 0.06                   | 0.06                  | -0.21                 | -2.57            | 0.27               | -2.30                   |
|             | M62      | -2.60                  | -0.54                  | 0.81                  | -0.38                 | -2.72            | 0.55               | -2.16                   |
|             | L66      | -0.06                  | -0.06                  | 0.05                  | 0.00                  | -0.07            | 0.00               | -0.07                   |
|             | Y67      | -1.90                  | -0.18                  | 0.27                  | -0.23                 | -2.03            | 0.33               | -1.70                   |
|             | D68      | -0.01                  | -0.46                  | 0.44                  | 0.00                  | -0.03            | 0.01               | -0.02                   |
|             | Q71      | -0.01                  | 0.01                   | -0.01                 | 0.00                  | -0.01            | 0.00               | -0.01                   |
|             | Q72      | -0.72                  | -0.15                  | 0.20                  | -0.10                 | -0.78            | 0.20               | -0.58                   |
|             | H73      | -0.07                  | -0.09                  | 0.09                  | 0.00                  | -0.07            | 0.01               | -0.06                   |
|             | I74      | -0.05                  | -0.07                  | 0.05                  | 0.00                  | -0.06            | 0.01               | -0.06                   |
|             | V75      | -0.85                  | 0.00                   | 0.06                  | -0.08                 | -0.86            | 0.08               | -0.78                   |
|             | L82      | -0.24                  | -0.02                  | 0.05                  | -0.01                 | -0.21            | 0.00               | -0.21                   |
|             | F86      | -0.55                  | -0.11                  | 0.20                  | -0.03                 | -0.50            | 0.03               | -0.47                   |
|             | F91      | -1.04                  | 0.04                   | 0.28                  | -0.10                 | -0.82            | 0.16               | -0.66                   |
|             | V93      | -2.39                  | 0.03                   | 0.36                  | -0.26                 | -2.25            | 0.39               | -1.87                   |
| K94         | -0.10    | -0.11                  | 0.12                   | 0.00                  | -0.09                 | 0.03             | -0.06              |                         |
| H96         | -1.65    | -0.07                  | 0.21                   | -0.18                 | -1.69                 | 0.37             | -1.32              |                         |
| I99         | -2.06    | -0.05                  | 0.15                   | -0.24                 | -2.20                 | 0.39             | -1.81              |                         |
| Y100        | -0.75    | -0.05                  | 0.11                   | -0.05                 | -0.74                 | 0.12             | -0.63              |                         |
| I103        | -0.34    | -0.01                  | 0.03                   | -0.02                 | -0.34                 | 0.01             | -0.33              |                         |
| <b>MDMX</b> | M53      | -0.47                  | -0.09                  | 0.16                  | -0.07                 | -0.46            | 0.13               | -0.33                   |
|             | H54      | -1.10                  | -0.28                  | 0.52                  | -0.17                 | -1.03            | 0.33               | -0.70                   |
|             | Y55      | -0.02                  | -0.01                  | 0.01                  | 0.00                  | -0.01            | 0.00               | -0.01                   |
|             | L56      | -0.12                  | -0.01                  | 0.02                  | 0.00                  | -0.12            | 0.01               | -0.11                   |
|             | Q58      | -0.52                  | -0.50                  | 0.57                  | -0.08                 | -0.53            | 0.25               | -0.27                   |
|             | I60      | -1.44                  | -0.03                  | 0.38                  | -0.11                 | -1.20            | 0.32               | -0.88                   |
|             | M61      | -2.89                  | -0.09                  | 0.72                  | -0.37                 | -2.62            | 0.72               | -1.90                   |
|             | Y66      | -2.10                  | -0.01                  | 0.18                  | -0.18                 | -2.12            | 0.28               | -1.83                   |
|             | Q71      | -0.57                  | 0.03                   | 0.05                  | -0.07                 | -0.55            | 0.14               | -0.41                   |
|             | H72      | -0.27                  | -0.03                  | 0.06                  | -0.01                 | -0.26            | 0.05               | -0.20                   |
|             | M73      | -0.06                  | -0.04                  | 0.02                  | 0.00                  | -0.08            | 0.00               | -0.08                   |
|             | V74      | -0.62                  | -0.03                  | 0.10                  | -0.04                 | -0.59            | 0.18               | -0.41                   |
|             | L81      | -0.02                  | 0.00                   | 0.01                  | 0.00                  | -0.02            | 0.00               | -0.02                   |
|             | F90      | -0.28                  | 0.00                   | 0.10                  | -0.01                 | -0.19            | 0.02               | -0.17                   |
|             | S91      | -0.01                  | -0.01                  | 0.01                  | 0.00                  | -0.01            | 0.00               | -0.01                   |
|             | V92      | -2.20                  | 0.00                   | 0.36                  | -0.27                 | -2.12            | 0.49               | -1.64                   |
|             | K93      | -0.10                  | 0.01                   | 0.00                  | 0.00                  | -0.09            | 0.03               | -0.06                   |
| P95         | -0.27    | 0.00                   | 0.01                   | -0.04                 | -0.30                 | 0.06             | -0.24              |                         |

|     |       |      |      |       |       |      |       |
|-----|-------|------|------|-------|-------|------|-------|
| L98 | -0.45 | 0.00 | 0.07 | -0.07 | -0.45 | 0.11 | -0.34 |
| Y99 | -0.05 | 0.00 | 0.02 | 0.00  | -0.04 | 0.00 | -0.04 |

---

**Table S11.** Each energy terms of binding free energy of residues within 5 Å from the binding interface of U3Z–MDM2/MDMX obtained by the ASIE method (all values are in kcal/mol). The average results of the three trajectories are displayed.

| Systems     | Residues | $\Delta\Delta E_{vdW}$ | $\Delta\Delta E_{ele}$ | $\Delta\Delta G_{gb}$ | $\Delta\Delta G_{np}$ | $\Delta\Delta H$ | $-T\Delta\Delta S$ | $\Delta\Delta G_{bind}$ |
|-------------|----------|------------------------|------------------------|-----------------------|-----------------------|------------------|--------------------|-------------------------|
| <b>MDM2</b> | V53      | -0.04                  | -0.02                  | 0.00                  | 0.00                  | -0.06            | 0.00               | -0.06                   |
|             | L54      | -2.47                  | -0.13                  | 0.50                  | -0.26                 | -2.37            | 0.57               | -1.79                   |
|             | F55      | -0.97                  | -0.14                  | 0.38                  | -0.12                 | -0.85            | 0.37               | -0.49                   |
|             | Y56      | -0.06                  | -0.01                  | 0.02                  | 0.00                  | -0.05            | 0.00               | -0.05                   |
|             | L57      | -0.70                  | -0.08                  | 0.13                  | -0.03                 | -0.68            | 0.05               | -0.63                   |
|             | Q59      | -0.77                  | -0.10                  | 0.22                  | -0.09                 | -0.73            | 0.16               | -0.56                   |
|             | I61      | -2.44                  | 0.03                   | 0.16                  | -0.22                 | -2.47            | 0.30               | -2.18                   |
|             | M62      | -2.53                  | -0.45                  | 0.91                  | -0.39                 | -2.46            | 0.67               | -1.79                   |
|             | L66      | -0.05                  | -0.05                  | 0.04                  | 0.00                  | -0.07            | 0.00               | -0.06                   |
|             | Y67      | -1.42                  | -0.08                  | 0.18                  | -0.16                 | -1.47            | 0.27               | -1.20                   |
|             | D68      | -0.01                  | -0.39                  | 0.37                  | 0.00                  | -0.03            | 0.01               | -0.02                   |
|             | Q71      | -0.02                  | 0.01                   | -0.01                 | 0.00                  | -0.01            | 0.00               | -0.01                   |
|             | Q72      | -0.53                  | -0.07                  | 0.13                  | -0.07                 | -0.55            | 0.06               | -0.48                   |
|             | H73      | -0.15                  | -0.01                  | 0.04                  | 0.00                  | -0.12            | 0.02               | -0.10                   |
|             | I74      | -0.06                  | -0.05                  | 0.03                  | 0.00                  | -0.10            | 0.01               | -0.09                   |
|             | V75      | -1.05                  | 0.01                   | 0.10                  | -0.09                 | -1.03            | 0.11               | -0.91                   |
|             | L82      | -0.20                  | -0.01                  | 0.05                  | 0.00                  | -0.17            | 0.00               | -0.16                   |
|             | F86      | -0.50                  | -0.13                  | 0.23                  | -0.03                 | -0.43            | 0.03               | -0.40                   |
|             | F91      | -1.09                  | -0.05                  | 0.38                  | -0.11                 | -0.86            | 0.18               | -0.69                   |
|             | V93      | -2.26                  | -0.06                  | 0.35                  | -0.22                 | -2.19            | 0.36               | -1.83                   |
| K94         | -0.10    | -0.44                  | 0.43                   | 0.00                  | -0.11                 | 0.03             | -0.08              |                         |
| E95         | -0.03    | 0.23                   | -0.20                  | 0.00                  | 0.00                  | 0.00             | 0.00               |                         |
| H96         | -1.74    | -0.28                  | 0.41                   | -0.15                 | -1.76                 | 0.19             | -1.57              |                         |
| R97         | -0.04    | -0.16                  | 0.15                   | 0.00                  | -0.06                 | 0.00             | -0.05              |                         |
| I99         | -2.40    | -0.10                  | 0.26                   | -0.24                 | -2.49                 | 0.37             | -2.12              |                         |
| Y100        | -0.65    | -0.05                  | 0.17                   | -0.07                 | -0.60                 | 0.52             | -0.08              |                         |
| I103        | -0.37    | -0.01                  | 0.04                   | -0.02                 | -0.35                 | 0.01             | -0.33              |                         |
| <b>MDMX</b> | M53      | -0.44                  | 0.01                   | 0.10                  | -0.06                 | -0.39            | 0.13               | -0.25                   |
|             | H54      | -0.98                  | -0.43                  | 0.62                  | -0.15                 | -0.94            | 0.32               | -0.63                   |
|             | Y55      | -0.06                  | -0.01                  | 0.02                  | 0.00                  | -0.04            | 0.00               | -0.04                   |
|             | L56      | -0.07                  | 0.01                   | 0.00                  | 0.00                  | -0.06            | 0.00               | -0.06                   |
|             | Q58      | -0.50                  | -0.40                  | 0.44                  | -0.07                 | -0.53            | 0.29               | -0.24                   |
|             | Y59      | -0.01                  | -0.01                  | 0.01                  | 0.00                  | -0.02            | 0.00               | -0.02                   |
|             | I60      | -1.68                  | -0.08                  | 0.35                  | -0.13                 | -1.54            | 0.35               | -1.19                   |
|             | M61      | -2.47                  | -0.31                  | 0.77                  | -0.34                 | -2.35            | 0.67               | -1.69                   |
|             | Y66      | -2.55                  | -0.08                  | 0.29                  | -0.26                 | -2.59            | 0.48               | -2.11                   |
|             | Q71      | -0.52                  | 0.02                   | 0.02                  | -0.04                 | -0.52            | 0.07               | -0.44                   |
|             | H72      | -0.20                  | -0.01                  | 0.03                  | -0.01                 | -0.19            | 0.04               | -0.15                   |
|             | M73      | -0.02                  | 0.01                   | -0.01                 | 0.00                  | -0.02            | 0.00               | -0.03                   |
|             | V74      | -0.68                  | -0.06                  | 0.18                  | -0.06                 | -0.61            | 0.28               | -0.33                   |
|             | F90      | -0.32                  | -0.08                  | 0.22                  | -0.01                 | -0.20            | 0.03               | -0.17                   |
|             | S91      | -0.02                  | 0.00                   | -0.01                 | 0.00                  | -0.02            | 0.00               | -0.02                   |
| V92         | -2.19    | -0.08                  | 0.37                   | -0.27                 | -2.17                 | 0.56             | -1.61              |                         |

|      |       |       |      |       |       |      |       |
|------|-------|-------|------|-------|-------|------|-------|
| K93  | -0.06 | -0.04 | 0.04 | 0.00  | -0.05 | 0.01 | -0.04 |
| P95  | -0.40 | 0.02  | 0.01 | -0.05 | -0.43 | 0.11 | -0.32 |
| L98  | -0.32 | -0.03 | 0.12 | -0.04 | -0.27 | 0.04 | -0.23 |
| Y99  | -0.25 | -0.04 | 0.09 | -0.03 | -0.23 | 0.04 | -0.19 |
| L102 | -0.01 | 0.00  | 0.00 | 0.00  | -0.01 | 0.00 | -0.01 |

---

**Table S12.** Each energy terms of binding free energy of residues within 5 Å from the binding interface of HRT–MDM2/MDMX obtained by the ASIE method (all values are in kcal/mol). The average results of the three trajectories are displayed.

| Systems     | Residues | $\Delta\Delta E_{vdW}$ | $\Delta\Delta E_{ele}$ | $\Delta\Delta G_{gb}$ | $\Delta\Delta G_{np}$ | $\Delta\Delta H$ | $-T\Delta\Delta S$ | $\Delta\Delta G_{bind}$ |
|-------------|----------|------------------------|------------------------|-----------------------|-----------------------|------------------|--------------------|-------------------------|
| <b>MDM2</b> | K51      | -0.24                  | 0.05                   | -0.03                 | -0.03                 | -0.25            | 0.05               | -0.20                   |
|             | V53      | -0.03                  | -0.02                  | 0.00                  | 0.00                  | -0.04            | 0.00               | -0.04                   |
|             | L54      | -2.51                  | -0.08                  | 0.32                  | -0.34                 | -2.62            | 0.55               | -2.07                   |
|             | F55      | -0.32                  | -0.07                  | 0.11                  | -0.01                 | -0.30            | 0.03               | -0.27                   |
|             | L57      | -0.64                  | -0.11                  | 0.13                  | -0.04                 | -0.65            | 0.08               | -0.58                   |
|             | Q59      | -0.10                  | -0.06                  | 0.08                  | 0.00                  | -0.08            | 0.01               | -0.07                   |
|             | I61      | -2.01                  | 0.05                   | 0.00                  | -0.21                 | -2.17            | 0.32               | -1.86                   |
|             | M62      | -2.71                  | -0.33                  | 0.59                  | -0.36                 | -2.80            | 0.70               | -2.10                   |
|             | Y67      | -2.87                  | -0.19                  | 0.28                  | -0.29                 | -3.08            | 0.65               | -2.44                   |
|             | Q72      | -0.98                  | -0.39                  | 0.36                  | -0.16                 | -1.17            | 0.41               | -0.76                   |
|             | H73      | -0.11                  | -0.02                  | 0.03                  | 0.00                  | -0.10            | 0.01               | -0.09                   |
|             | V75      | -0.50                  | 0.01                   | 0.01                  | -0.04                 | -0.51            | 0.02               | -0.49                   |
|             | L82      | -0.28                  | -0.01                  | 0.04                  | -0.02                 | -0.26            | 0.01               | -0.25                   |
|             | F86      | -0.51                  | -0.06                  | 0.15                  | -0.03                 | -0.45            | 0.03               | -0.42                   |
|             | F91      | -0.89                  | 0.10                   | 0.17                  | -0.09                 | -0.70            | 0.11               | -0.59                   |
|             | V93      | -2.25                  | 0.02                   | 0.41                  | -0.21                 | -2.04            | 0.41               | -1.62                   |
|             | K94      | -0.24                  | -1.08                  | 1.02                  | -0.02                 | -0.31            | 0.19               | -0.13                   |
| H96         | -1.42    | -0.68                  | 0.64                   | -0.17                 | -1.63                 | 0.43             | -1.20              |                         |
| I99         | -1.63    | -0.03                  | 0.12                   | -0.20                 | -1.74                 | 0.34             | -1.39              |                         |
| Y100        | -0.38    | 0.00                   | 0.05                   | -0.03                 | -0.36                 | 0.03             | -0.33              |                         |
| I103        | -0.57    | 0.00                   | 0.02                   | -0.06                 | -0.61                 | 0.04             | -0.56              |                         |
| <b>MDMX</b> | M53      | -2.41                  | -0.22                  | 0.57                  | -0.35                 | -2.42            | 0.73               | -1.69                   |
|             | H54      | -0.13                  | -0.17                  | 0.20                  | 0.00                  | -0.11            | 0.01               | -0.09                   |
|             | L56      | -0.57                  | -0.10                  | 0.11                  | -0.03                 | -0.59            | 0.11               | -0.48                   |
|             | Q58      | -0.11                  | -0.08                  | 0.10                  | 0.00                  | -0.09            | 0.01               | -0.08                   |
|             | I60      | -2.08                  | 0.04                   | 0.05                  | -0.23                 | -2.22            | 0.38               | -1.83                   |
|             | M61      | -3.02                  | -0.62                  | 0.83                  | -0.39                 | -3.21            | 0.75               | -2.46                   |
|             | Y66      | -2.07                  | -0.12                  | 0.18                  | -0.19                 | -2.20            | 0.40               | -1.80                   |
|             | D67      | -0.04                  | -0.11                  | 0.11                  | 0.00                  | -0.04            | 0.03               | 0.00                    |
|             | Q68      | -0.25                  | -0.15                  | 0.20                  | -0.04                 | -0.25            | 0.08               | -0.17                   |
|             | E70      | -0.04                  | 0.27                   | -0.24                 | 0.00                  | -0.01            | 0.02               | 0.01                    |
|             | Q71      | -1.24                  | -0.02                  | 0.18                  | -0.13                 | -1.21            | 0.33               | -0.89                   |
|             | H72      | -0.22                  | -0.09                  | 0.10                  | 0.00                  | -0.22            | 0.05               | -0.17                   |
|             | M73      | -0.04                  | 0.01                   | -0.02                 | 0.00                  | -0.06            | 0.00               | -0.06                   |
|             | V74      | -0.65                  | 0.00                   | 0.02                  | -0.07                 | -0.69            | 0.15               | -0.54                   |
|             | L81      | -0.19                  | 0.00                   | 0.03                  | -0.01                 | -0.18            | 0.00               | -0.17                   |
|             | F90      | -1.05                  | -0.05                  | 0.26                  | -0.10                 | -0.93            | 0.16               | -0.77                   |
|             | S91      | -0.02                  | 0.08                   | -0.09                 | 0.00                  | -0.03            | 0.00               | -0.04                   |
| V92         | -2.72    | -0.15                  | 0.55                   | -0.31                 | -2.63                 | 0.61             | -2.02              |                         |
| P95         | -0.43    | 0.00                   | 0.00                   | -0.05                 | -0.48                 | 0.13             | -0.34              |                         |
| L98         | -1.17    | -0.03                  | 0.21                   | -0.19                 | -1.18                 | 0.50             | -0.69              |                         |
| Y99         | -0.85    | 0.03                   | 0.11                   | -0.11                 | -0.82                 | 0.12             | -0.69              |                         |

**Table S13.** Each energy terms of binding free energy of residues within 5 Å from the binding interface of HRQ–MDM2/MDMX obtained by the ASIE method (all values are in kcal/mol). The average results of the three trajectories are displayed.

| Systems     | Residues | $\Delta\Delta E_{vdW}$ | $\Delta\Delta E_{ele}$ | $\Delta\Delta G_{gb}$ | $\Delta\Delta G_{np}$ | $\Delta\Delta H$ | $-\Delta\Delta S$ | $\Delta\Delta G_{bind}$ |
|-------------|----------|------------------------|------------------------|-----------------------|-----------------------|------------------|-------------------|-------------------------|
| <b>MDM2</b> | V53      | -0.02                  | 0.00                   | -0.01                 | 0.00                  | -0.03            | 0.00              | -0.03                   |
|             | L54      | -1.14                  | -0.04                  | 0.20                  | -0.08                 | -1.06            | 0.25              | -0.82                   |
|             | F55      | -0.58                  | -0.10                  | 0.24                  | -0.07                 | -0.51            | 0.19              | -0.31                   |
|             | L57      | -0.75                  | -0.05                  | 0.10                  | -0.07                 | -0.77            | 0.14              | -0.63                   |
|             | Q59      | -0.33                  | -0.25                  | 0.20                  | -0.06                 | -0.44            | 0.20              | -0.23                   |
|             | I61      | -1.49                  | -0.03                  | 0.21                  | -0.15                 | -1.46            | 0.31              | -1.15                   |
|             | M62      | -1.10                  | -0.23                  | 0.32                  | -0.14                 | -1.14            | 0.35              | -0.79                   |
|             | Y67      | -1.93                  | -0.60                  | 0.70                  | -0.19                 | -2.02            | 0.51              | -1.51                   |
|             | Q72      | -0.09                  | -0.06                  | 0.07                  | 0.00                  | -0.08            | 0.00              | -0.07                   |
|             | H73      | -0.04                  | -0.03                  | 0.03                  | 0.00                  | -0.04            | 0.00              | -0.04                   |
|             | I74      | -0.01                  | 0.00                   | -0.01                 | 0.00                  | -0.01            | 0.00              | -0.01                   |
|             | V75      | -0.49                  | -0.04                  | 0.20                  | -0.05                 | -0.38            | 0.08              | -0.30                   |
|             | L82      | -0.07                  | -0.01                  | 0.04                  | 0.00                  | -0.04            | 0.00              | -0.04                   |
|             | F86      | -0.09                  | -0.01                  | 0.06                  | 0.00                  | -0.04            | 0.00              | -0.04                   |
|             | F91      | -0.40                  | 0.00                   | 0.17                  | -0.03                 | -0.27            | 0.05              | -0.22                   |
|             | V93      | -0.86                  | -0.01                  | 0.12                  | -0.10                 | -0.85            | 0.19              | -0.67                   |
| I99         | -0.85    | -0.02                  | 0.12                   | -0.15                 | -0.90                 | 0.27             | -0.63             |                         |
| M102        | -0.02    | -0.02                  | 0.02                   | 0.00                  | -0.01                 | 0.00             | -0.01             |                         |
| I103        | -0.10    | 0.00                   | 0.01                   | 0.00                  | -0.10                 | 0.00             | -0.09             |                         |
| <b>MDMX</b> | V52      | -0.02                  | -0.01                  | 0.00                  | 0.00                  | -0.03            | 0.00              | -0.03                   |
|             | M53      | -1.73                  | -0.69                  | 0.81                  | -0.21                 | -1.82            | 0.56              | -1.26                   |
|             | H54      | -0.11                  | -0.02                  | 0.05                  | 0.00                  | -0.08            | 0.01              | -0.07                   |
|             | L56      | -0.47                  | -0.04                  | 0.09                  | -0.01                 | -0.43            | 0.05              | -0.38                   |
|             | Q58      | -0.07                  | -0.03                  | 0.05                  | 0.00                  | -0.05            | 0.00              | -0.04                   |
|             | I60      | -3.02                  | -0.11                  | 0.42                  | -0.16                 | -2.87            | 0.46              | -2.41                   |
|             | M61      | -0.84                  | -0.25                  | 0.35                  | -0.14                 | -0.88            | 0.39              | -0.49                   |
|             | Y66      | -1.90                  | -0.13                  | 0.26                  | -0.14                 | -1.92            | 0.47              | -1.45                   |
|             | Q71      | -0.52                  | -0.12                  | 0.19                  | -0.06                 | -0.52            | 0.04              | -0.48                   |
|             | H72      | -0.09                  | -0.09                  | 0.09                  | 0.00                  | -0.08            | 0.00              | -0.08                   |
|             | M73      | -0.05                  | 0.03                   | -0.05                 | 0.00                  | -0.07            | 0.01              | -0.06                   |
|             | V74      | -1.02                  | -0.04                  | 0.34                  | -0.03                 | -0.75            | 0.34              | -0.41                   |
|             | F90      | -1.30                  | -0.67                  | 1.15                  | -0.13                 | -0.96            | 0.32              | -0.64                   |
|             | S91      | -0.03                  | 0.08                   | -0.08                 | 0.00                  | -0.03            | 0.00              | -0.03                   |
|             | V92      | -1.31                  | -0.05                  | 0.18                  | -0.15                 | -1.32            | 0.26              | -1.07                   |
|             | P95      | -0.72                  | -0.08                  | 0.05                  | -0.09                 | -0.84            | 0.26              | -0.57                   |
| S96         | -0.01    | -0.03                  | 0.03                   | 0.00                  | 0.00                  | 0.00             | 0.00              |                         |
| L98         | -1.48    | -0.08                  | 0.35                   | -0.19                 | -1.40                 | 0.35             | -1.05             |                         |
| Y99         | -0.87    | -0.04                  | 0.22                   | -0.15                 | -0.85                 | 0.19             | -0.67             |                         |
| L102        | -0.06    | 0.00                   | 0.02                   | 0.00                  | -0.04                 | 0.00             | -0.04             |                         |

**Table S14.** Each energy terms of binding free energy of residues within 5 Å from the binding interface of HRE–MDM2/MDMX obtained by the ASIE method (all values are in kcal/mol). The average results of the three trajectories are displayed.

| Systems     | Residues | $\Delta\Delta E_{vdW}$ | $\Delta\Delta E_{ele}$ | $\Delta\Delta G_{gb}$ | $\Delta\Delta G_{np}$ | $\Delta\Delta H$ | $-T\Delta\Delta S$ | $\Delta\Delta G_{bind}$ |
|-------------|----------|------------------------|------------------------|-----------------------|-----------------------|------------------|--------------------|-------------------------|
| <b>MDM2</b> | V53      | -0.03                  | -0.03                  | 0.03                  | 0.00                  | -0.03            | 0.00               | -0.03                   |
|             | L54      | -2.55                  | 0.05                   | 0.27                  | -0.35                 | -2.57            | 0.60               | -1.98                   |
|             | F55      | -0.11                  | -0.04                  | 0.07                  | 0.00                  | -0.08            | 0.01               | -0.07                   |
|             | L57      | -0.72                  | -0.29                  | 0.36                  | -0.05                 | -0.70            | 0.08               | -0.62                   |
|             | Q59      | -0.09                  | -0.03                  | 0.06                  | 0.00                  | -0.07            | 0.01               | -0.06                   |
|             | I61      | -2.59                  | 0.02                   | 0.13                  | -0.29                 | -2.73            | 0.37               | -2.36                   |
|             | M62      | -3.75                  | -0.21                  | 0.85                  | -0.48                 | -3.59            | 0.74               | -2.85                   |
|             | Y67      | -2.22                  | -0.17                  | 0.25                  | -0.25                 | -2.38            | 0.30               | -2.08                   |
|             | Q72      | -0.85                  | -0.15                  | 0.27                  | -0.11                 | -0.83            | 0.21               | -0.61                   |
|             | H73      | -0.11                  | -0.07                  | 0.07                  | 0.00                  | -0.11            | 0.01               | -0.10                   |
|             | I74      | -0.06                  | -0.03                  | 0.00                  | 0.00                  | -0.09            | 0.00               | -0.09                   |
|             | V75      | -0.73                  | 0.00                   | 0.06                  | -0.07                 | -0.73            | 0.07               | -0.66                   |
|             | L82      | -0.48                  | -0.09                  | 0.20                  | -0.05                 | -0.42            | 0.03               | -0.39                   |
|             | F86      | -0.66                  | -0.35                  | 0.57                  | -0.09                 | -0.53            | 0.15               | -0.38                   |
|             | F91      | -1.06                  | 0.02                   | 0.34                  | -0.11                 | -0.81            | 0.15               | -0.66                   |
|             | V93      | -2.49                  | -0.23                  | 0.51                  | -0.16                 | -2.37            | 0.40               | -1.97                   |
|             | K94      | -0.24                  | -1.33                  | 1.27                  | -0.01                 | -0.30            | 0.17               | -0.13                   |
| H96         | -3.26    | -2.52                  | 2.20                   | -0.28                 | -3.86                 | 1.18             | -2.68              |                         |
| I99         | -2.64    | -0.02                  | 0.19                   | -0.27                 | -2.73                 | 0.37             | -2.36              |                         |
| Y100        | -1.03    | -0.01                  | 0.11                   | -0.11                 | -1.04                 | 0.17             | -0.86              |                         |
| I103        | -0.61    | -0.01                  | 0.09                   | -0.07                 | -0.59                 | 0.04             | -0.55              |                         |
| <b>MDMX</b> | V52      | -0.03                  | -0.02                  | 0.02                  | 0.00                  | -0.03            | 0.00               | -0.03                   |
|             | M53      | -2.26                  | 0.06                   | 0.48                  | -0.30                 | -2.02            | 0.53               | -1.49                   |
|             | H54      | -0.16                  | 0.01                   | 0.03                  | 0.00                  | -0.12            | 0.01               | -0.10                   |
|             | L56      | -0.80                  | -0.20                  | 0.29                  | -0.06                 | -0.77            | 0.01               | -0.76                   |
|             | Q58      | -0.08                  | -0.06                  | 0.09                  | 0.00                  | -0.05            | 0.00               | -0.05                   |
|             | I60      | -2.03                  | 0.02                   | 0.17                  | -0.25                 | -2.09            | 0.67               | -1.42                   |
|             | M61      | -2.58                  | -0.20                  | 0.60                  | -0.36                 | -2.53            | 0.59               | -1.94                   |
|             | Y66      | -2.54                  | -0.13                  | 0.29                  | -0.27                 | -2.64            | 0.51               | -2.13                   |
|             | Q68      | -0.15                  | -0.11                  | 0.13                  | -0.01                 | -0.14            | 0.04               | -0.10                   |
|             | Q71      | -1.05                  | 0.11                   | 0.05                  | -0.12                 | -1.01            | 0.34               | -0.67                   |
|             | H72      | -0.14                  | -0.08                  | 0.05                  | 0.00                  | -0.17            | 0.02               | -0.15                   |
|             | M73      | -0.06                  | 0.01                   | -0.02                 | 0.00                  | -0.09            | 0.00               | -0.08                   |
|             | V74      | -0.97                  | -0.03                  | 0.14                  | -0.11                 | -0.98            | 0.19               | -0.79                   |
|             | L81      | -0.44                  | -0.13                  | 0.21                  | -0.06                 | -0.42            | 0.03               | -0.39                   |
|             | L85      | -0.31                  | -0.11                  | 0.16                  | -0.04                 | -0.30            | 0.03               | -0.27                   |
|             | F90      | -1.19                  | -0.23                  | 0.49                  | -0.14                 | -1.06            | 0.20               | -0.86                   |
|             | V92      | -2.42                  | -0.10                  | 0.60                  | -0.25                 | -2.18            | 0.59               | -1.59                   |
| K93         | -0.08    | -0.56                  | 0.53                   | 0.00                  | -0.10                 | 0.04             | -0.07              |                         |
| P95         | -0.40    | -0.05                  | 0.03                   | -0.05                 | -0.47                 | 0.17             | -0.30              |                         |
| L98         | -1.84    | -0.01                  | 0.39                   | -0.31                 | -1.77                 | 0.70             | -1.07              |                         |
| Y99         | -0.85    | 0.02                   | 0.12                   | -0.12                 | -0.84                 | 0.13             | -0.71              |                         |
| M101        | -0.16    | -0.36                  | 0.35                   | -0.01                 | -0.18                 | 0.04             | -0.15              |                         |



**Table S15.** Each energy terms of binding free energy of residues within 5 Å from the binding interface of HRH–MDM2/MDMX obtained by the ASIE method (all values are in kcal/mol). The average results of the three trajectories are displayed.

| Systems     | Residues | $\Delta AE_{vdW}$ | $\Delta AE_{ele}$ | $\Delta AG_{gb}$ | $\Delta AG_{np}$ | $\Delta AH$ | $-TAAS$ | $\Delta AG_{bind}$ |
|-------------|----------|-------------------|-------------------|------------------|------------------|-------------|---------|--------------------|
| <b>MDM2</b> | V53      | -0.03             | -0.02             | 0.01             | 0.00             | -0.04       | 0.00    | -0.04              |
|             | L54      | -2.97             | -0.04             | 0.27             | -0.39            | -3.15       | 0.60    | -2.55              |
|             | F55      | -0.12             | 0.02              | 0.00             | 0.00             | -0.10       | 0.01    | -0.09              |
|             | L57      | -0.59             | -0.09             | 0.10             | -0.03            | -0.61       | 0.02    | -0.59              |
|             | Q59      | -0.04             | -0.06             | 0.07             | 0.00             | -0.03       | 0.00    | -0.03              |
|             | I61      | -1.68             | 0.00              | 0.08             | -0.21            | -1.81       | 0.46    | -1.34              |
|             | M62      | -1.15             | 0.07              | 0.09             | -0.20            | -1.19       | 0.28    | -0.91              |
|             | Y67      | -1.72             | 0.02              | 0.23             | -0.18            | -1.65       | 0.27    | -1.38              |
|             | H73      | -0.11             | -0.01             | 0.05             | 0.00             | -0.08       | 0.01    | -0.08              |
|             | V75      | -0.39             | 0.00              | 0.04             | -0.02            | -0.38       | 0.01    | -0.37              |
|             | L82      | -0.23             | -0.02             | 0.05             | -0.01            | -0.20       | 0.01    | -0.20              |
|             | F86      | -0.56             | -0.09             | 0.19             | -0.04            | -0.51       | 0.04    | -0.47              |
|             | F91      | -0.88             | 0.14              | 0.18             | -0.09            | -0.64       | 0.14    | -0.50              |
|             | V93      | -1.93             | 0.00              | 0.43             | -0.09            | -1.58       | 0.19    | -1.39              |
|             | K94      | -0.16             | -0.30             | 0.31             | -0.01            | -0.16       | 0.02    | -0.13              |
|             | H96      | -3.20             | -2.00             | 1.64             | -0.32            | -3.88       | 1.23    | -2.64              |
|             | I99      | -2.36             | -0.10             | 0.21             | -0.27            | -2.52       | 0.35    | -2.18              |
| Y100        | -1.09    | 0.05              | 0.05              | -0.11            | -1.09            | 0.23        | -0.86   |                    |
| I103        | -0.50    | -0.01             | 0.02              | -0.03            | -0.52            | 0.02        | -0.50   |                    |
| <b>MDMX</b> | V52      | -0.01             | 0.00              | 0.00             | 0.00             | -0.01       | 0.00    | -0.01              |
|             | M53      | -1.59             | -0.07             | 0.36             | -0.22            | -1.52       | 0.28    | -1.23              |
|             | H54      | -0.67             | -0.05             | 0.15             | -0.07            | -0.64       | 0.16    | -0.47              |
|             | L56      | -0.66             | 0.01              | 0.04             | -0.04            | -0.65       | 0.07    | -0.58              |
|             | Q58      | -0.24             | -0.14             | 0.15             | -0.02            | -0.25       | 0.05    | -0.20              |
|             | I60      | -1.76             | 0.00              | 0.10             | -0.20            | -1.85       | 0.46    | -1.40              |
|             | M61      | -0.62             | -0.13             | 0.19             | -0.09            | -0.66       | 0.20    | -0.46              |
|             | Y66      | -0.52             | -0.01             | 0.06             | -0.04            | -0.52       | 0.07    | -0.45              |
|             | Q71      | -0.05             | 0.01              | 0.01             | 0.00             | -0.04       | 0.01    | -0.03              |
|             | H72      | -0.04             | -0.01             | 0.01             | 0.00             | -0.04       | 0.00    | -0.04              |
|             | V74      | -0.89             | -0.01             | 0.06             | -0.11            | -0.94       | 0.21    | -0.73              |
|             | L81      | -0.32             | -0.02             | 0.05             | -0.03            | -0.33       | 0.02    | -0.31              |
|             | L85      | -0.22             | -0.01             | 0.03             | -0.02            | -0.22       | 0.02    | -0.19              |
|             | F90      | -1.07             | 0.00              | 0.21             | -0.12            | -0.99       | 0.24    | -0.75              |
|             | S91      | -0.01             | -0.02             | 0.01             | 0.00             | -0.01       | 0.00    | -0.01              |
|             | V92      | -1.39             | 0.00              | 0.11             | -0.21            | -1.48       | 0.36    | -1.11              |
|             | K93      | -0.04             | 0.01              | -0.01            | 0.00             | -0.03       | 0.00    | -0.03              |
| P95         | -0.31    | 0.01              | -0.03             | -0.04            | -0.36            | 0.05        | -0.32   |                    |
| L98         | -1.68    | 0.02              | 0.14              | -0.24            | -1.75            | 0.42        | -1.33   |                    |
| Y99         | -0.51    | -0.01             | 0.10              | -0.07            | -0.49            | 0.06        | -0.43   |                    |
| M101        | -0.08    | -0.03             | 0.03              | 0.00             | -0.08            | 0.00        | -0.08   |                    |

**Table S16.** Each energy terms of binding free energy of residues within 5 Å from the binding interface of HTZ–MDM2/MDMX obtained by the ASIE method (all values are in kcal/mol). The average results of the three trajectories are displayed.

| Systems     | Residues | $\Delta\Delta E_{vdW}$ | $\Delta\Delta E_{ele}$ | $\Delta\Delta G_{gb}$ | $\Delta\Delta G_{np}$ | $\Delta\Delta H$ | $-\Delta\Delta S$ | $\Delta\Delta G_{bind}$ |
|-------------|----------|------------------------|------------------------|-----------------------|-----------------------|------------------|-------------------|-------------------------|
| <b>MDM2</b> | K51      | -0.04                  | -0.07                  | 0.07                  | 0.00                  | -0.04            | 0.01              | -0.03                   |
|             | V53      | -0.04                  | -0.01                  | -0.01                 | 0.00                  | -0.05            | 0.00              | -0.05                   |
|             | L54      | -2.26                  | -0.24                  | 0.49                  | -0.20                 | -2.22            | 0.52              | -1.70                   |
|             | F55      | -1.03                  | -0.15                  | 0.33                  | -0.12                 | -0.98            | 0.37              | -0.61                   |
|             | Y56      | -0.06                  | 0.00                   | 0.01                  | 0.00                  | -0.05            | 0.00              | -0.05                   |
|             | L57      | -0.82                  | -0.05                  | 0.12                  | -0.03                 | -0.79            | 0.10              | -0.69                   |
|             | Q59      | -0.46                  | -0.10                  | 0.20                  | -0.04                 | -0.39            | 0.09              | -0.31                   |
|             | I61      | -1.85                  | 0.00                   | 0.30                  | -0.21                 | -1.77            | 0.70              | -1.07                   |
|             | M62      | -2.21                  | -0.02                  | 0.51                  | -0.35                 | -2.07            | 0.42              | -1.65                   |
|             | L66      | -0.06                  | -0.03                  | 0.02                  | 0.00                  | -0.06            | 0.00              | -0.06                   |
|             | Y67      | -2.45                  | -0.14                  | 0.38                  | -0.35                 | -2.56            | 0.37              | -2.19                   |
|             | Q72      | -0.77                  | 0.02                   | 0.15                  | -0.12                 | -0.72            | 0.14              | -0.58                   |
|             | H73      | -0.16                  | 0.00                   | 0.04                  | 0.00                  | -0.12            | 0.01              | -0.11                   |
|             | V75      | -0.59                  | 0.00                   | 0.09                  | -0.05                 | -0.55            | 0.03              | -0.51                   |
|             | L82      | -0.27                  | -0.03                  | 0.08                  | -0.01                 | -0.22            | 0.01              | -0.21                   |
|             | F86      | -0.58                  | -0.12                  | 0.24                  | -0.04                 | -0.50            | 0.04              | -0.46                   |
|             | F91      | -1.04                  | 0.02                   | 0.31                  | -0.09                 | -0.81            | 0.16              | -0.64                   |
|             | V93      | -1.71                  | -0.02                  | 0.28                  | -0.18                 | -1.63            | 0.45              | -1.19                   |
|             | K94      | -0.13                  | -0.10                  | 0.12                  | 0.00                  | -0.12            | 0.01              | -0.10                   |
|             | E95      | -0.03                  | 0.21                   | -0.18                 | 0.00                  | 0.00             | 0.00              | 0.00                    |
| H96         | -2.60    | 0.21                   | 0.09                   | -0.25                 | -2.55                 | 0.44             | -2.12             |                         |
| I99         | -2.00    | -0.07                  | 0.16                   | -0.22                 | -2.13                 | 0.39             | -1.74             |                         |
| Y100        | -0.93    | -0.08                  | 0.19                   | -0.06                 | -0.87                 | 0.09             | -0.77             |                         |
| I103        | -0.40    | -0.01                  | 0.05                   | -0.02                 | -0.38                 | 0.01             | -0.37             |                         |
| <b>MDMX</b> | V49      | -0.10                  | -0.01                  | 0.01                  | -0.01                 | -0.11            | 0.02              | -0.09                   |
|             | K50      | -0.46                  | -0.31                  | 0.33                  | -0.05                 | -0.49            | 0.11              | -0.39                   |
|             | E51      | 0.00                   | 0.10                   | -0.09                 | 0.00                  | 0.01             | 0.00              | 0.01                    |
|             | V52      | -0.02                  | 0.00                   | -0.01                 | 0.00                  | -0.03            | 0.00              | -0.03                   |
|             | M53      | -2.35                  | -0.97                  | 1.03                  | -0.23                 | -2.51            | 0.54              | -1.97                   |
|             | H54      | -1.16                  | -0.34                  | 0.34                  | -0.11                 | -1.27            | 0.36              | -0.91                   |
|             | Y55      | -0.03                  | 0.00                   | 0.00                  | 0.00                  | -0.02            | 0.00              | -0.02                   |
|             | L56      | -0.33                  | -0.02                  | 0.05                  | -0.01                 | -0.31            | 0.04              | -0.27                   |
|             | Q58      | -0.06                  | -0.03                  | 0.05                  | 0.00                  | -0.04            | 0.01              | -0.03                   |
|             | Y59      | -0.02                  | 0.00                   | 0.00                  | 0.00                  | -0.02            | 0.00              | -0.02                   |
|             | I60      | -1.71                  | 0.01                   | 0.15                  | -0.21                 | -1.76            | 0.34              | -1.42                   |
|             | M61      | -0.97                  | -0.29                  | 0.39                  | -0.14                 | -1.02            | 0.23              | -0.78                   |
|             | L65      | -0.02                  | -0.01                  | 0.00                  | 0.00                  | -0.02            | 0.00              | -0.02                   |
|             | Y66      | -0.80                  | -0.03                  | 0.13                  | -0.12                 | -0.81            | 0.23              | -0.59                   |
|             | D67      | -0.01                  | -0.07                  | 0.06                  | 0.00                  | -0.01            | 0.00              | -0.01                   |
|             | Q71      | -0.23                  | 0.00                   | 0.05                  | -0.04                 | -0.22            | 0.06              | -0.17                   |
|             | H72      | -0.08                  | -0.03                  | 0.04                  | 0.00                  | -0.08            | 0.01              | -0.07                   |
|             | M73      | -0.01                  | 0.01                   | -0.01                 | 0.00                  | -0.02            | 0.00              | -0.02                   |
| V74         | -0.66    | -0.01                  | 0.06                   | -0.06                 | -0.67                 | 0.09             | -0.58             |                         |

|      |       |       |       |       |       |      |       |
|------|-------|-------|-------|-------|-------|------|-------|
| L81  | -0.07 | 0.00  | 0.02  | 0.00  | -0.05 | 0.00 | -0.05 |
| L85  | -0.04 | 0.00  | 0.01  | 0.00  | -0.03 | 0.00 | -0.03 |
| F 90 | -0.79 | -0.01 | 0.30  | -0.09 | -0.59 | 0.21 | -0.38 |
| S91  | -0.01 | 0.00  | -0.01 | 0.00  | -0.02 | 0.00 | -0.02 |
| V92  | -1.99 | -0.02 | 0.24  | -0.24 | -2.01 | 0.45 | -1.55 |
| K93  | -0.04 | -0.09 | 0.09  | 0.00  | -0.04 | 0.01 | -0.03 |
| P95  | -0.68 | 0.00  | 0.02  | -0.05 | -0.72 | 0.18 | -0.53 |
| P97  | -0.01 | 0.00  | -0.01 | 0.00  | -0.01 | 0.00 | -0.01 |
| L98  | -1.04 | -0.03 | 0.23  | -0.16 | -0.99 | 0.31 | -0.69 |
| Y99  | -0.92 | -0.07 | 0.19  | -0.11 | -0.90 | 0.15 | -0.74 |
| M101 | -0.03 | 0.01  | -0.01 | 0.00  | -0.03 | 0.00 | -0.02 |
| L102 | -0.06 | 0.01  | 0.00  | 0.00  | -0.05 | 0.00 | -0.05 |

---

**Table S17.** Each energy terms of binding free energy of residues within 5 Å from the binding interface of HU8–MDM2/MDMX obtained by the ASIE method (all values are in kcal/mol). The average results of the three trajectories are displayed.

| Systems     | Residues | $\Delta\Delta E_{vdW}$ | $\Delta\Delta E_{ele}$ | $\Delta\Delta G_{gb}$ | $\Delta\Delta G_{np}$ | $\Delta\Delta H$ | $-\Delta\Delta S$ | $\Delta\Delta G_{bind}$ |
|-------------|----------|------------------------|------------------------|-----------------------|-----------------------|------------------|-------------------|-------------------------|
| <b>MDM2</b> | L54      | -3.09                  | -0.07                  | 0.33                  | -0.45                 | -3.28            | 0.67              | -2.61                   |
|             | F55      | -1.28                  | -0.28                  | 0.42                  | -0.17                 | -1.31            | 0.50              | -0.81                   |
|             | L57      | -0.58                  | 0.00                   | 0.04                  | -0.02                 | -0.57            | 0.10              | -0.47                   |
|             | Q59      | -0.69                  | -0.15                  | 0.26                  | -0.07                 | -0.65            | 0.14              | -0.51                   |
|             | I61      | -1.74                  | 0.02                   | 0.01                  | -0.19                 | -1.91            | 0.54              | -1.36                   |
|             | M62      | -1.48                  | -0.02                  | 0.21                  | -0.24                 | -1.53            | 0.33              | -1.20                   |
|             | Y67      | -1.29                  | -0.02                  | 0.12                  | -0.17                 | -1.35            | 0.17              | -1.18                   |
|             | Q72      | -0.17                  | -0.01                  | 0.06                  | -0.01                 | -0.14            | 0.02              | -0.12                   |
|             | H73      | -0.16                  | -0.02                  | 0.05                  | -0.01                 | -0.14            | 0.03              | -0.11                   |
|             | V75      | -0.54                  | -0.01                  | 0.02                  | -0.04                 | -0.57            | 0.03              | -0.54                   |
|             | L82      | -0.15                  | -0.01                  | 0.02                  | 0.00                  | -0.14            | 0.00              | -0.14                   |
|             | F86      | -0.33                  | -0.04                  | 0.09                  | -0.02                 | -0.30            | 0.01              | -0.29                   |
|             | F91      | -0.75                  | -0.02                  | 0.13                  | -0.06                 | -0.70            | 0.09              | -0.62                   |
|             | V93      | -2.32                  | -0.03                  | 0.42                  | -0.14                 | -2.07            | 0.56              | -1.52                   |
|             | K94      | -0.77                  | 0.26                   | -0.13                 | -0.07                 | -0.71            | 0.10              | -0.61                   |
|             | H96      | -3.33                  | -1.74                  | 1.19                  | -0.31                 | -4.19            | 0.99              | -3.19                   |
|             | I99      | -2.00                  | -0.03                  | 0.04                  | -0.20                 | -2.19            | 0.34              | -1.86                   |
| Y100        | -0.60    | -0.12                  | 0.14                   | -0.05                 | -0.62                 | 0.05             | -0.57             |                         |
| I103        | -0.27    | -0.01                  | 0.01                   | -0.01                 | -0.28                 | 0.01             | -0.27             |                         |
| <b>MDMX</b> | V49      | -0.03                  | 0.00                   | 0.00                  | 0.00                  | -0.03            | 0.01              | -0.02                   |
|             | K50      | -0.71                  | -0.10                  | 0.13                  | -0.13                 | -0.81            | 0.17              | -0.64                   |
|             | E51      | -0.02                  | -0.06                  | 0.06                  | 0.00                  | -0.01            | 0.00              | -0.01                   |
|             | V52      | -0.01                  | 0.00                   | -0.01                 | 0.00                  | -0.02            | 0.00              | -0.02                   |
|             | M53      | -2.23                  | -0.51                  | 0.72                  | -0.30                 | -2.33            | 0.62              | -1.71                   |
|             | H54      | -1.35                  | -0.79                  | 0.67                  | -0.13                 | -1.60            | 0.50              | -1.11                   |
|             | Y55      | -0.03                  | 0.00                   | 0.00                  | 0.00                  | -0.03            | 0.00              | -0.03                   |
|             | L56      | -0.27                  | 0.05                   | -0.06                 | -0.01                 | -0.29            | 0.04              | -0.25                   |
|             | Q58      | -0.49                  | -0.15                  | 0.19                  | -0.04                 | -0.49            | 0.13              | -0.36                   |
|             | I60      | -1.27                  | -0.01                  | 0.05                  | -0.15                 | -1.39            | 0.22              | -1.17                   |
|             | M61      | -0.80                  | -0.05                  | 0.19                  | -0.11                 | -0.77            | 0.28              | -0.49                   |
|             | Y66      | -0.39                  | -0.07                  | 0.12                  | -0.07                 | -0.40            | 0.07              | -0.33                   |
|             | Q71      | -0.07                  | 0.00                   | 0.01                  | -0.01                 | -0.06            | 0.01              | -0.05                   |
|             | H72      | -0.27                  | 0.01                   | 0.03                  | -0.03                 | -0.27            | 0.07              | -0.20                   |
|             | V74      | -0.65                  | 0.01                   | 0.13                  | -0.07                 | -0.58            | 0.17              | -0.41                   |
|             | L81      | -0.04                  | 0.01                   | -0.01                 | 0.00                  | -0.04            | 0.00              | -0.04                   |
|             | L85      | -0.03                  | 0.01                   | -0.01                 | 0.00                  | -0.03            | 0.00              | -0.03                   |
|             | F90      | -0.91                  | 0.13                   | 0.07                  | -0.10                 | -0.82            | 0.12              | -0.70                   |
|             | S91      | 0.00                   | 0.01                   | -0.01                 | 0.00                  | -0.01            | 0.00              | -0.01                   |
|             | V92      | -2.04                  | 0.00                   | 0.14                  | -0.24                 | -2.14            | 0.46              | -1.68                   |
| K93         | -0.06    | 0.12                   | -0.10                  | 0.00                  | -0.05                 | 0.01             | -0.04             |                         |
| P95         | -0.43    | 0.01                   | 0.00                   | -0.05                 | -0.46                 | 0.08             | -0.38             |                         |
| P97         | -0.01    | 0.00                   | 0.00                   | 0.00                  | -0.01                 | 0.00             | -0.01             |                         |
| L98         | -0.86    | 0.01                   | 0.04                   | -0.14                 | -0.95                 | 0.29             | -0.67             |                         |

|      |       |       |       |       |       |      |       |
|------|-------|-------|-------|-------|-------|------|-------|
| Y99  | -0.51 | -0.02 | 0.11  | -0.06 | -0.48 | 0.08 | -0.40 |
| M101 | -0.01 | 0.02  | -0.02 | 0.00  | -0.01 | 0.00 | -0.01 |
| L102 | -0.05 | 0.00  | 0.00  | 0.00  | -0.05 | 0.00 | -0.05 |

---
